1  
2  
3  
4  
5  
6  
7  
8  
9  
10  
11  
12  
13  
14  
15  
16  
17  
18  
19

**The RNA helicase Ded1 regulates translation and granule formation during multiple phases of cellular stress responses**

Peyman P. Aryanpur<sup>1\*</sup>, Telsa M. Mittelmeier<sup>1</sup>, and Timothy A. Bolger<sup>1#</sup>

<sup>1</sup> Department of Molecular and Cellular Biology, University of Arizona, Tucson, Arizona, USA.

Running title: Ded1 regulates translation and RNP granules in stress

# Address correspondence to T.A.B., [tbolger@email.arizona.edu](mailto:tbolger@email.arizona.edu)

\* Present address: Beckman Research Institute, Duarte, CA, USA.

P.P.A. and T.M.M. contributed equally to this work.

20 **Abstract:**

21 Ded1 is a conserved RNA helicase that promotes translation initiation in steady-state  
22 conditions. Ded1 has also been shown to regulate translation during cellular stress and affect the  
23 dynamics of stress granules (SGs), accumulations of RNA and protein linked to translation  
24 repression. To better understand its role in stress responses, we examined Ded1 function in two  
25 different models: *DED1* overexpression and oxidative stress. *DED1* overexpression inhibits  
26 growth and promotes the formation of SGs. A *ded1* mutant lacking the low-complexity C-  
27 terminal region (*ded1- $\Delta$ CT*), which mediates Ded1 oligomerization and interaction with the  
28 translation factor eIF4G, suppressed these phenotypes, consistent with other stresses. During  
29 oxidative stress, a *ded1- $\Delta$ CT* mutant was defective in growth and in SG formation compared to  
30 wild-type cells, although SGs were increased rather than decreased in these conditions. Unlike  
31 stress induced by direct TOR inhibition, the phenotypes in both models were only partially  
32 dependent on eIF4G interaction, suggesting an additional contribution from Ded1  
33 oligomerization. Furthermore, examination of the growth defects and translational changes  
34 during oxidative stress suggested that Ded1 plays a role during recovery from stress. Integrating  
35 these disparate results, we propose that Ded1 controls multiple aspects of translation and RNP  
36 dynamics in both initial stress responses and during recovery.

37

38

## 39 **Introduction:**

40           Organisms are frequently subjected to various adverse conditions, including a lack of  
41 nutrients, chemical imbalances, and exposure to toxic substances. In order to survive and adapt  
42 to these stresses, cells employ a variety of responses, including highly coordinated changes in  
43 gene expression (1-3). Changes in translation play a particularly large role in stress responses  
44 because of their ability to rapidly alter the proteome and the need to reduce the outsized energy  
45 requirements of protein synthesis during stress. A number of different signaling mechanisms  
46 converge on the translation machinery in stress conditions, including activation of the integrated  
47 stress response (ISR) that results in inhibitory phosphorylation of the translation factor eIF2 and  
48 down-regulation of the target-of-rapamycin (TOR) pathway that integrates growth signals in a  
49 variety of conditions (4, 5). Translation of most mRNAs, especially those associated with  
50 growth, is greatly diminished during stress conditions (6). On the other hand, “stress-responsive”  
51 genes are up-regulated, and ribosome profiling of stressed cells has shown increases in  
52 occupancy at upstream open reading frames (uORFs) and non-AUG initiation (7, 8). These data  
53 suggest that the translational stress response is complex and specific, but the sources of this  
54 specificity are not fully clear.

55           A common feature of many types of stress conditions is the formation of stress granules  
56 (SGs), non-membranous organelles composed of RNAs and proteins (9). SGs appear to form as a  
57 result of multiple interactions amongst these components, often including proteins with low-  
58 complexity, intrinsically-disordered regions (IDRs) that promote liquid-liquid phase separation  
59 (10). Despite close association with both stress conditions and translation repression, the function  
60 of SGs is not well understood, although mutations in genes required for SG formation also  
61 reduce cell survival in stress (9). Stress granules are often suggested to function as sorting and

62 storage sites for mRNAs during stress (11). Consistent with this hypothesis, RNA-seq and  
63 localization studies have shown that some mRNAs are enriched in SGs while others are depleted,  
64 and mRNAs are able to actively exchange between SGs, the cytosol, and other structures (12-  
65 14). The mRNAs in SGs have generally been considered to be translationally-repressed, although  
66 a recent study has suggested that this may not always be the case (15).

67 Ded1 is a translation factor in budding yeast that plays several different roles in  
68 translation initiation (16, 17). Ded1 (DDX3X in humans) is a member of the DEAD-box RNA  
69 helicase family, which utilize ATP to alter RNA-RNA and RNA-protein interactions and are  
70 critical for many gene expression processes (18). Similar to many DEAD-box proteins, the Ded1  
71 domain structure consists of a central helicase core flanked by long extensions that are predicted  
72 to be IDRs (Figure 1A). These N- and C-terminal regions mediate binding to other proteins,  
73 including members of the eIF4F translation complex, and oligomerization of Ded1 itself (19-23).  
74 Canonically, Ded1 stimulates translation initiation in steady-state growth conditions by  
75 unwinding secondary structure in 5' UTRs, facilitating start site scanning by the translation pre-  
76 initiation complex (PIC). Thus, mRNAs with more complex, structured 5' UTRs tend to be  
77 hyper-dependent on Ded1 activity, while those with simpler 5' UTRs are less affected (24, 25).  
78 Furthermore, *ded1* mutation or depletion results in utilization of alternative translation initiation  
79 sites (ATIS) that may affect downstream translation or protein function (25). Ded1 also promotes  
80 assembly of the 43S PIC on mRNA, again in an mRNA-specific manner (19, 23, 26, 27).

81 Ded1 and its orthologs have also been implicated in translation repression during stress  
82 conditions and are associated with SGs in particular. Ded1 and DDX3X are major protein  
83 components of SGs and can affect SG assembly (19, 28, 29). Overexpression of *DED1* alone can  
84 induce SG-like foci in cells (19), while Ded1 undergoes phase separation *in vitro* under

85 conditions of high Ded1 concentration, elevated temperature, and/or the presence of RNA (30,  
86 31). These effects are at least partially mediated by the N- and C-terminal IDRs (19, 30, 31).  
87 Overall, Ded1 appears to promote SG formation, although the consequences of this stimulation  
88 have not been fully defined. Iserman et al. have proposed that sequestration of Ded1 into  
89 granules during heat shock causes a switch in translation to mRNAs with less complex 5' UTRs,  
90 but this model has not been fully tested (31).

91         Recently, we showed that Ded1 has a role downstream of the TOR pathway in the  
92 translational stress response (32). Specifically, when the TOR pathway was down-regulated,  
93 Ded1 was required for efficient translation repression and growth inhibition. In particular, the  
94 low-complexity C-terminal region of Ded1 was necessary for these effects, which promoted  
95 degradation of its binding partner eIF4G. We proposed that in these conditions, Ded1 remodeled  
96 translation complexes to cause dissociation and degradation of eIF4G, thus reducing bulk  
97 translation during stress. However, it is currently unclear how Ded1's role in SG dynamics may  
98 affect this model, particularly in different cellular stresses. Here we sought to address these gaps  
99 by examining Ded1-dependent mechanisms of translation regulation in two different conditions.  
100 First, upon *DED1* overexpression, both growth inhibition and SG formation were dependent on  
101 Ded1 levels and the presence of the C-terminal region, but not helicase activity. Furthermore,  
102 Ded1 interaction with eIF4G had only a modest effect, suggesting a contribution from Ded1  
103 oligomerization. Second, when cells were subjected to oxidative stress through addition of  
104 peroxide to the media, the C-terminal region played critical roles both in survival as well as the  
105 ability of cells to recovery from the stress over time. Interestingly, deletion of the C-terminal  
106 region increased SG formation during oxidative stress, in a manner opposite to the  
107 overexpression results. Similar to overexpression, Ded1 interaction with eIF4G played a

108 moderate role in responding to oxidative stress. Consistent with the effects on growth and SG  
109 formation, reporter assays revealed that Ded1 and its C-terminal region mediate changes in  
110 translation during a time course of peroxide treatment. To integrate these results, we propose a  
111 biphasic model for the function of Ded1 in the stress response wherein it has distinct functions  
112 on cell survival/growth, translation, and SGs in an early response phase and during a later  
113 recovery/adaptation phase.

114

### 115 **Results:**

116 *DED1* growth inhibition is dependent on protein levels and the C-terminal region but not the  
117 helicase domain

118 We recently showed that Ded1 plays a role in the translational response to TOR pathway  
119 inhibition in a manner dependent on its C-terminal domain and interaction with eIF4G (32). To  
120 examine whether this mechanism is similar during other conditions of translation repression,  
121 including SG induction, we first utilized overexpression of *DED1*. Hilliker et al. previously  
122 demonstrated that *DED1* overexpression causes growth inhibition and formation of SG-like  
123 aggregates, dependent on the presence of conserved “assembly domains” (19). Likewise, we  
124 observed severe growth inhibition upon overexpression of tagged, wild-type *DED1* from a  
125 galactose-inducible promoter (Figure 1B, *DED1-HHA*). However, when untagged *DED1* was  
126 expressed from a similar plasmid backbone, the growth inhibition, while still present, was much  
127 less severe (Figure 1B, *DED1/H*). Western blotting of the expressed constructs showed that  
128 Ded1 protein levels of the tagged version were about twice that of the untagged *DED1*,  
129 suggesting that the C-terminal tag stabilizes the protein (Figure 1C). This result further suggests  
130 that the growth inhibition is quite sensitive to Ded1 protein levels. Supporting this idea,  
131 overexpression of *DED1* from two untagged plasmids in the same cells caused a greater decrease

132 in growth, similar to tagged *DED1* (Figure 1B, *DED1/H* + *DED1/T*). Untagged *DED1* was used  
133 for the remainder of this study unless otherwise noted.

134 We next sought to determine whether the functional requirements we identified in TOR  
135 pathway downregulation also affect *DED1*-mediated growth inhibition. Consistent with previous  
136 results (19), deletion of the C-terminal region, *ded1-ΔCT* ( $\Delta 536-604$ ), largely abrogated the  
137 ability of Ded1 to inhibit growth (Figure 1D). In our prior study, a smaller deletion of the final  
138 14 amino acids of the C-terminal region (*ded1-Δ591-604*), which greatly reduced binding to  
139 eIF4G *in vitro*, phenocopied the larger deletion (32). In contrast with these results after TOR  
140 inhibition, overexpressing the *ded1-Δ591-604* mutant inhibited growth only slightly less than  
141 wild-type *DED1* (Figure 1D), indicating that there are differences between the Ded1-dependent  
142 mechanisms. Likewise, each of a set of similar 14 amino acid deletions in the C-terminal region  
143 showed growth inhibition similar to wild-type *DED1*, either in combination with another *DED1*  
144 overexpression plasmid (Figure 1E) or alone (Supplemental Figure S1). Furthermore, we  
145 constructed a mutant that deleted most of the central helicase domain, *ded1-Δ190-497*, leaving  
146 the N- and C-terminal domains fused together with only short flanking sequences (Figure 1A).  
147 This mutant inhibited growth to a slightly greater extent than wild-type *DED1* (Figure 1D). It  
148 was previously shown that growth inhibition did not require Ded1 activity, as an ATPase-  
149 deficient mutant had a similar phenotype to wild-type *DED1* (19), and this result extends that  
150 conclusion by suggesting that the N- and C-terminal regions themselves are sufficient for these  
151 effects. Again, this differs from our prior results in TOR inhibition wherein Ded1 activity was  
152 required for the effects on translation repression (32).

153

154 *Ded1-induced SGs are dependent on the C-terminal region but not the helicase domain*

155 Overexpression of *DED1* has been shown to induce SG-like foci that contain a number of  
156 SG components, including mRNAs and translation factors, and formation of the Ded1-induced  
157 SGs correlates with growth inhibition (19). Therefore, we tested whether SG formation was  
158 affected by the *ded1* mutations examined above using a *PAB1-GFP* reporter, a well-established  
159 yeast SG marker (33). After 7 hours of galactose induction, *DED1*-overexpressing cells  
160 frequently contained one or more Pab1-GFP-positive foci, indicating SG formation in 24% of  
161 cells, while very few SGs were observed in control cells (Figure 2A, B). Further increasing  
162 *DED1* levels (with a second overexpression plasmid) led to an additional increase in the  
163 percentage of cells with SGs, consistent with the inhibitory effects on growth. In contrast, cells  
164 expressing the *ded1-ΔCT* mutant contained almost no SGs, similar to the control cells. However,  
165 both the *ded1-Δ591-604* and *Δ190-497* mutants both displayed rates of SG induction similar to  
166 the wild-type *DED1*-expressing cells (Figure 2B). Interestingly, we noted that the Pab1-GFP foci  
167 induced by the *ded1-Δ190-497* mutant had a somewhat different qualitative appearance with  
168 individual foci more elongated and extended compared to the largely round SGs in the wild-type  
169 *DED1*-expressing cells (Supplemental Figure S2). This phenotype is also distinct from that with  
170 the tagged version of *DED1*, which were often very large but were still more rounded than the  
171 *ded1-Δ190-497* mutant. Overall, these results indicate that the Ded1 C-terminal region plays an  
172 important role in inducing SGs, while, surprisingly, the helicase domain does not. Furthermore,  
173 the SG results closely correlate with the growth inhibition shown in Figure 1, suggesting a  
174 functional relationship between growth inhibition and SG formation.

175

176 *Ded1* interaction with *eIF4G* has moderate effects on *DED1* overexpression phenotypes



177           The C-terminal domain of Ded1 has been shown to both interact with eIF4G and mediate  
178 Ded1 self-oligomerization, but how these individual interactions affect Ded1 function *in vivo*  
179 remain unclear (19-21). To begin to distinguish between these interactions during cellular stress,  
180 we constructed eIF4G1-null (*tif4631Δ*) mutants, overexpressed *DED1* and the *ded1* mutants in  
181 these cells, and examined them for defects in growth and SG formation. *DED1* overexpression  
182 inhibited growth to a similar extent in the eIF4G1-null mutant as compared to in wild-type cells,  
183 indicating that the Ded1-eIF4G interaction is not critical for this inhibition (Figure 3A).  
184 Interestingly, however, rescue of the inhibition with expression of the *ded1-ΔCT* mutant was  
185 greatly reduced in the eIF4G1-null cells. A double mutant of *tif4631Δ* and *ded1-ΔCT* (expressed  
186 from the endogenous promoter) showed moderate synthetic growth defects even in ideal growth  
187 conditions (data not shown), so the effect of overexpressing the *ded1* mutant in eIF4G1-null cells  
188 may be due to displacing the endogenous wild-type Ded1 rather than a stress-related defect.

189           Examining these cells for SG formation revealed no significant difference between wild-  
190 type and eIF4G1-null cells when wild-type *DED1* is overexpressed (Figure 3B, C). Likewise,  
191 very few Pab1-GFP SGs were formed in eIF4G1-null cells when *ded1-ΔCT* was expressed,  
192 similar to wild-type cells. These results indicate that eIF4G1 is not strictly required for formation  
193 of the Ded1-induced stress granules. However, expression of the *ded1-Δ591-604* and *ded1-Δ190-*  
194 *497* mutants had reduced numbers of SGs in eIF4G1-null compared to in wild-type cells (Figure  
195 3B, C). Western blotting showed roughly similar levels of Ded1, *ded1-ΔCT*, and *ded1-Δ591-604*  
196 in wild-type and eIF4G1-null cells, arguing against effects due to protein levels for these mutants  
197 (Supplemental Figure S3). The induction of *ded1-Δ190-497* protein was reduced roughly 2-fold  
198 in eIF4G1-null cells, perhaps indicating an effect of eIF4G1 on protein expression or stability,  
199 although the difference was not statistically significant. Overall, these results suggest that the

200 mutants represent sensitized backgrounds that show that eIF4G1 indeed has an effect on SG  
201 formation, though it is moderate. Furthermore, given the differences between these mutants and  
202 *ded1- $\Delta$ CT*, it is likely that Ded1 oligomerization, the only other known C-terminal-mediated  
203 interaction, is a major contributor to SG formation.

204

205 *Ded1 promotes cell survival and growth during oxidative stress*

206         The above approaches provided insight into Ded1-dependent mechanisms for SG  
207 formation and growth inhibition. However, overexpression of *DED1* does not recapitulate the  
208 complexity of physiological stress responses; therefore, we next examined the role of Ded1 in  
209 responding to oxidative stress through treatment of cells with hydrogen peroxide. We first tested  
210 whether Ded1 affects cell growth by measuring culture density over time in the absence and  
211 presence of peroxide (Figure 4A). In untreated cells, wild-type, *ded1- $\Delta$ CT*, and *ded1- $\Delta$ 591-604*  
212 cells had similar growth rates (left panel). In peroxide-treated cultures (right panel), wild-type  
213 cells had a growth lag ( $\lambda$ ) of about 11 hours, as calculated using the Gompertz growth equation  
214 (Supplemental Table S1A) (34). This indicated that growth was inhibited as part of the stress  
215 response, followed by an adaptation/recovery phase during which growth resumed. In contrast,  
216 the lag in *ded1- $\Delta$ CT* cells was significantly longer (22 hours) before growth resumed.  
217 Interestingly, the *ded1- $\Delta$ 591-604* mutant also showed an increased growth lag compared to wild-  
218 type cells (Figure 4A, right), unlike in overexpression where it had a similar effect to wild-type  
219 *DED1*, although the defect was not as strong as in the *ded1- $\Delta$ CT* mutant. These results suggest  
220 that Ded1 and the C-terminal region have roles in cell growth during oxidative stress.

221         To further investigate these effects, cells were treated with peroxide, and then equal  
222 numbers of cells were plated on rich media to examine recovery of growth. As expected,

223 peroxide treatment inhibited the growth of wild-type cells compared to untreated cells (Figure  
224 4B, 2 days). Strikingly, peroxide-treated *ded1-ΔCT* cells displayed a severe growth inhibition  
225 compared to wild-type cells. Consistent with the growth curves, the *ded1-Δ591-604* mutant also  
226 showed moderate growth defects in this assay. These growth defects could be due either to either  
227 a delay in growth or an increase in cell death following oxidative stress. To examine the role of  
228 cell death, relative cell survival was calculated by counting colony-forming units (CFU) from  
229 wild-type and mutant strains in the presence and absence of peroxide treatment. All strains  
230 showed a significant decrease in survival after stress, but the *ded1-ΔCT* mutant had a  
231 significantly larger decrease than wild-type cells, indicating a loss of viability (Figure 4C).  
232 However, delayed growth was eventually observed after extended incubation of the treated *ded1-*  
233 *ΔCT* cells (Figure 4B, 3 days), suggesting that there is also a delayed recovery of growth in these  
234 cells. Further supporting this idea, the viability of peroxide-treated *ded1-Δ591-604* cells was not  
235 significantly different from wild-type cells (Figure 4C), so the reduced growth in this mutant  
236 after stress may be largely the result of delayed recovery rather than reduced survival. Overall,  
237 these results indicate that Ded1 plays a critical role in both cell survival upon oxidative stress  
238 induction and cell growth during stress recovery.

239

#### 240 *The role of Ded1 in stress granule dynamics during oxidative stress*

241 Next, we examined the formation of SGs during hydrogen peroxide treatment. Peroxide  
242 treatment of wild-type cells caused an induction of SGs, defined as Pab1-GFP-positive foci, over  
243 a time course of several hours (Figure 5A, B). The percentage of cells containing SGs peaked at  
244 about 12 hours after treatment at 28%, then began to decrease, falling to near pre-treatment  
245 levels by 20 hours. Thus, the SG time-course correlates with the observed growth curve in Figure

246 4, with SGs increasing during the lag in growth and then decreasing as growth resumes. On the  
247 other hand, in *ded1-ΔCT* cells, SGs were more sharply induced, with over 2-fold more cells  
248 (61%) containing Pab1-GFP foci at 12 hours compared to wild-type (Figure 5B). Similar to wild-  
249 type cells, SGs began to diminish after 12 hours in *ded1-ΔCT* cells, but mutant cells continued to  
250 show a higher percentage of SGs even at later time points. Given the increased growth lag of  
251 *ded1-ΔCT* cells, this result suggests that resumption of growth correlates with eventual SG  
252 clearance. Similar to the growth defects, the *ded1-Δ591-604* mutant had slightly increased SGs  
253 compared to wild-type, although the difference was not statistically significant (Figure 5C).  
254 Notably, the *ded1-ΔCT* results in peroxide are different from the results using *ded1-ΔCT*  
255 overexpression (Figure 2). We suggest that this is a result of different means of SG induction. In  
256 contrast to the overexpression model, in oxidative stress, multiple different pathways and factors  
257 are participating in SG formation, and translation regulation can also affect SG induction (9, 35).  
258 The C-terminal region of Ded1 is thus not required for SG formation in these conditions. To  
259 examine this possibility, we expressed GFP-tagged *DED1* and *ded1-ΔCT* on low-copy plasmids  
260 in wild-type cells and treated them with peroxide. With this modest overexpression, Ded1-GFP  
261 formed some foci even in the absence of peroxide, but Ded1-positive foci increased after  
262 peroxide treatment, consistent with SG induction (Supplemental Figure S4). On the other hand,  
263 *ded1-ΔCT*-GFP formed multiple small speckles after peroxide treatment instead of larger  
264 discrete foci, which likely represents a defect in the ability of the mutant protein to properly  
265 condense and associate with SGs during oxidative stress.

266

267 *Ded1 interaction with eIF4G affects its role in oxidative stress*

268 To investigate the role of Ded1's interaction with eIF4G during oxidative stress, we  
269 examined null mutants of eIF4G1 (*tif4631Δ*) and *tif4631Δ ded1-ΔCT* double mutants for growth  
270 and SG defects. Following peroxide treatment, *tif4631Δ* cells showed a delay in growth that was  
271 intermediate ( $\lambda = 16.2\text{h}$ ) between *ded1-ΔCT* and wild-type control cells (Figures 6A &  
272 Supplemental Table S1B), indicating that eIF4G1 also plays a role in this stress response but that  
273 the effects in the *ded1-ΔCT* mutant cannot be explained solely through Ded1 interaction with  
274 eIF4G1. Supporting this hypothesis, the *tif4631Δ ded1-ΔCT* double mutant had a similar growth  
275 delay to the *ded1-ΔCT* mutant alone ( $\lambda = 18.1\text{h}$  for both in this set). These results suggest an  
276 epistatic relationship between Ded1 and eIF4G wherein the effect of eIF4G on growth in  
277 peroxide is mediated through its interaction with the Ded1 C-terminal region, but the C-terminal  
278 region plays an additional role in this process, perhaps by promoting Ded1 oligomerization. The  
279 *tif4631Δ ded1-ΔCT* double mutant also showed a slight defect in the rate of growth during  
280 recovery, unlike the other mutants tested (Supplemental Table S1B). However, a similar reduced  
281 growth rate was observed in untreated mutant cells, suggesting that it is due to an effect on  
282 translation in steady-state conditions rather than stress-related (data not shown). We also  
283 examined the formation of SGs in the *tif4631Δ* mutant cells. Both *tif4631Δ* and *tif4631Δ ded1-*  
284 *ΔCT* mutants showed increased SGs compared to wild-type controls after 12 hours of treatment  
285 with peroxide, similar to the increase observed with *ded1-ΔCT* (Figure 6B, C). Taken together,  
286 these results suggest that the interaction of Ded1 with eIF4G1 mediates at least part of Ded1  
287 function during oxidative stress.

288

289 *Ded1 promotes resumption of translation during adaptation to oxidative stress*

290 Ded1 function in translation has often focused on the dependence of mRNAs with  
291 structured 5'UTRs (16). To examine Ded1-dependent translational changes during oxidative  
292 stress, we utilized a set of previously published luciferase reporters with 5'UTRs derived from  
293 *RPL41A* that contain either a stem loop ( $\Delta G_{\text{free}} = -3.7$  kcal/mol) or are unstructured (Figure 7A)  
294 (24). The stem-loop containing reporter is translated less well than the unstructured one in wild-  
295 type cells, and this difference is often exacerbated in *ded1* mutants (23, 24, 36). Here, we  
296 transformed these reporters into wild-type and *ded1- $\Delta$ CT* mutant cells, treated the cells with  
297 peroxide, and performed luciferase assays over a time course. In wild-type cells, we observed  
298 significant drops in luciferase activity (to 60% of the untreated activity) with both the  
299 unstructured and structured reporters in the first two hours of treatment (Figure 7B). This  
300 reduction is consistent with the overall reduction in translation that is expected during stress  
301 conditions, although we note that the magnitude of the repression is less severe with these  
302 reporters than when bulk protein synthesis is assessed (35), likely due to the exogenous nature of  
303 the reporters. The reduction in translation in wild-type cells was maintained through 5.5 hours of  
304 treatment, but activity then increased to pre-treatment levels or above by 8 hours and was  
305 maintained through 12 hours (Figure 7B). Interestingly, this resumption of translation precedes  
306 the end of the lag phase in growth by several hours (Figure 4A & S4), suggesting that cells need  
307 this time to reshape their proteome for resumed growth. Consistent with prior studies, the  
308 structured reporter showed reduced luciferase activity compared to the unstructured one  
309 (approximately 30%) in untreated conditions (Figure 7B), but the ratio of structured to  
310 unstructured activity did not vary significantly during the time course.

311 In *ded1- $\Delta$ CT* mutant cells, activity from the unstructured reporter was similar to wild-  
312 type cells before treatment (Figure 7B). However, in treated *ded1- $\Delta$ CT* cells, translation

313 progressively decreased over the time course through 8 hours, when translation in wild-type cells  
314 had begun to recover, and the mutant cells only partially recovered (to roughly one-third of pre-  
315 treatment levels) by 12 hours. This result is consistent with the substantially increased lag phase  
316 in the *ded1-ΔCT* cells in Figure 4, suggesting that the growth delays in the mutant may be the  
317 result of defects in resuming translation. The structured reporter in the *ded1-ΔCT* mutant showed  
318 a similar trend, although its activity did not recover to the same extent as the unstructured  
319 reporter at 12 hours (Figure 7B). Furthermore, structured reporter activity in *ded1-ΔCT* cells was  
320 significantly lower at earlier time points as well, including nearly two-fold lower in untreated  
321 cells and after 2 hours of peroxide treatment. This early reduction in translation of mRNAs with  
322 structured 5'UTRs may underlie the decreased cell survival observed in *ded1-ΔCT* mutant cells  
323 (see Figure 4C). Overall, these results suggest that Ded1 plays critical roles in regulating  
324 translation both during the initial response to stress and during the transition to resumed growth  
325 in recovering cells.

326

## 327 **Discussion:**

328 In this study, we examined the role of the DEAD-box RNA helicase Ded1 in stress  
329 responses using two different models. First, utilizing *DED1* overexpression, we and others  
330 observed growth inhibition, translation repression, and induction of SGs (Figure 1, 2 and (19, 26,  
331 37)). These effects were largely mediated through the Ded1 C-terminal region, which has  
332 previously been shown to self-oligomerize and to interact with eIF4G (19, 38). Further mutant  
333 analysis indicated that the eIF4G interaction played a moderate role in growth inhibition and SG  
334 formation (Figure 3), suggesting that Ded1 oligomerization may also be a driver of these effects.  
335 Second, we subjected cells to oxidative stress through hydrogen peroxide treatment. In these

336 conditions, Ded1 and the C-terminus were critical for cell survival and growth (Figure 4).  
337 Notably, in sharp contrast to overexpression, *ded1-ΔCT* mutant cells formed more SGs than  
338 wild-type in oxidative stress (Figure 5), suggesting different requirements for granule formation.  
339 More similar to overexpression phenotypes, both SG formation and the ability to resume growth  
340 after peroxide addition were moderately dependent on eIF4G and its interaction with Ded1  
341 (Figure 6). Finally, in wild-type cells, translation of reporters with both structured and  
342 unstructured 5'UTRs was reduced upon oxidative stress induction but recovered after extended  
343 treatment, slightly preceding the resumption of growth, while this recovery was substantially  
344 delayed and reduced in *ded1-ΔCT* cells (Figure 7).

345 To integrate these disparate results, we propose the following biphasic framework for  
346 cellular stress and Ded1 function (Figure 8). The first phase is the initial response to stress  
347 conditions wherein cells shift away from pro-growth homeostasis. A number of pathways and  
348 processes are involved in this shift, resulting in inhibition of growth and proliferation as cellular  
349 resources are redirected to counter the stress (3-5). Changes in translation, specifically repression  
350 of bulk translation and upregulation of stress-specific proteins, have a critical contribution to this  
351 stress-induced growth inhibition (3, 6). SGs are also formed during this phase in response to  
352 many stresses, and SG dynamics are intricately linked to translation, e.g. translation repression is  
353 associated with SG formation and vice versa (9, 39). The second phase consists of a gradual  
354 resumption of pre-stress conditions through either removal of the stress or sufficient adaptation  
355 to it (40, 41). Cells transition from a lag phase back to growth, and general translation also  
356 resumes, after a peak in repression in the earlier response (6). Expression of stress-related  
357 proteins may also decrease, but this effect is dependent on the specific stress, its severity, and  
358 whether the stress condition is maintained. Stress granules are reduced in number during this



359 phase (e.g. Figure 5), although to what extent this loss is due to disassembly, degradation, or  
360 simple dilution as cells begin dividing is unclear.

361 Multiple lines of evidence suggest that Ded1 plays roles in several of the different aspects  
362 of stress responses described above. During the initial response phase, Ded1 functions to inhibit  
363 growth (Figure 8, #1), indicated by increased growth in *ded1* mutants (compared to wild-type)  
364 treated with rapamycin, as we showed previously (32). Likewise, the growth inhibition by *DED1*  
365 overexpression (and suppression of this phenotype in *ded1-ΔCT*) that we and others have  
366 observed is consistent with this role (Figure 1 and (19, 26, 37)). We suggest that a failure to  
367 properly halt growth during stress represents a misallocation of cellular resources, resulting in a  
368 loss of viability, as we observed in *ded1-ΔCT* mutants during both oxidative stress and nitrogen  
369 withdrawal (Figure 4C and (32)). Furthermore, the results for *ded1* mutants during oxidative  
370 stress suggest that Ded1 also plays a role in the length of the lag and the transition to resumed  
371 growth during the recovery phase (Figure 8, #2). Although *ded1-ΔCT* cells have reduced  
372 viability compared to wild-type, this mutant also has an increased lag phase and a delay in  
373 resuming growth, as observed in the growth curves and serial dilutions (Figure 4A & B). Further  
374 supporting this role, the *ded1-Δ591-604* mutant has nearly the same viability as wild-type cells  
375 but is still delayed in recovery of growth. Overall, our results suggest that Ded1 and its C-  
376 terminal region have critical roles in both growth inhibition during stress responses and in  
377 resumption of growth during recovery.

378 Since Ded1 is known to regulate translation, it is likely that these effects on growth by  
379 Ded1 are mediated through changes in translation. During the initial phase of the stress response,  
380 we propose that Ded1 inhibits growth through repression of general translation (Figure 8, #3).  
381 This hypothesis has been proposed by several groups and is supported by prior results in

382 rapamycin-treated cells, *DED1* overexpressing cells, and *in vitro* translation assays (19, 26, 32,  
383 37). In particular, we showed previously that translation repression was reduced in *ded1-ΔCT*  
384 cells treated with rapamycin (32). Consistent with that result, here we observed defects in  
385 translation of the structured 5'UTR reporter in *ded1-ΔCT* mutant cells at all time-points during  
386 oxidative stress (Figure 7). However, while we also observed changes in translation of the  
387 unstructured reporter during the time-course, the reductions in *ded1-ΔCT* mutant cells at early-  
388 time points were similar to wild-type cells. This result may reflect limitations of the luciferase  
389 reporter to completely replicate the translational changes in the stress response; for example, the  
390 roughly two-fold reduction in translation of the reporters at early time points is much less severe  
391 than has been reported using polysome sedimentation analysis for similar peroxide  
392 concentrations (35). In any case, the severe growth inhibition of *DED1* overexpression and the  
393 substantial reduction in cell survival in *ded1-ΔCT* cells after peroxide treatment (Figures 1B &  
394 4C) strongly suggest that Ded1 affects translation during the early portions of stress responses. In  
395 addition, given the differences between the structured and unstructured reporters, Ded1 is likely  
396 to have complex effects on different subsets of mRNAs. Guenther et al. showed that Ded1 can  
397 control the usage of alternative translation initiation sites (25), so Ded1 may have a larger  
398 repressive effect on some mRNAs and/or upregulate translation of other mRNAs, perhaps  
399 including stress-related ones.

400         As a second role during stress, here we also present evidence linking Ded1 to translation  
401 during the recovery phase (Figure 8, #4). In wild-type cells, translation of both the structured and  
402 unstructured reporters recovered by the 8-hour time point, preceding the end of the lag phase and  
403 resumption of growth (Figures 4 and 7). In *ded1-ΔCT* cells, however, translation progressively  
404 decreased and then recovered more slowly, consistent with the delay in growth in this mutant.

405 Therefore, in addition to repressing translation during the initial stress response, Ded1 (and the  
406 C-terminal region) also play a role in promoting translation during the recovery, specifically as  
407 cells transition from a stress-induced lag phase to a resumption of growth. As in the initial  
408 response (and during steady-state conditions), it is likely that Ded1 also has mRNA-specific  
409 effects during this phase. Future studies using ribosomal profiling may be able to further  
410 investigate this possibility.

411 Ded1 has previously been extensively linked to SGs, and it appears to play a role in their  
412 formation during stress (Figure 8, #5). This hypothesis is most directly supported by the  
413 formation of SG-like foci upon *DED1* overexpression, observed here and previously (Figure 2  
414 and (19)), as well as a reduction in SGs following knockdown or pharmacological inhibition of  
415 its homolog DDX3X (28, 42). In addition, Ded1 and its homologs have been identified numerous  
416 times as stress granule components, including in proteomic analysis of SGs (9, 19, 28, 29, 43).  
417 Further complementing these results, *ded1* mutations also altered SG dynamics in both the  
418 overexpression model and oxidative stress (Figures 2 & 5). However, mutants such as *ded1-ΔCT*  
419 had different effects on SG formation in the two models, decreasing SGs when overexpressed  
420 but increasing SGs upon peroxide treatment. In overexpression, SG formation is likely driven by  
421 Ded1 directly; therefore, defects in Ded1's interactions with itself and other SG components may  
422 lead to a reduction in SGs. This effect would be minimized, however, in oxidative stress where  
423 many pathways and factors contribute to SG formation. Furthermore, changes in translation also  
424 influence SG dynamics (9, 39); thus, we suggest that the increases in SGs in *ded1* mutants  
425 treated with peroxide are caused by differences in translation in these mutants during stress.  
426 Ded1's specific function in SGs remains unknown and is complicated by limitations in the  
427 understanding of SGs themselves (44). As an RNA helicase, it is reasonable to speculate that

428 Ded1 may affect the sorting of mRNAs in SGs, as recently proposed by Hondele et al. (30), but  
429 further work would be needed to examine this hypothesis. Others have suggested that Ded1 may  
430 have a role in SG disassembly during the recovery phase as well (19), but there is little  
431 supporting evidence to date. Here, we observed that SGs decrease at similar rates in wild-type  
432 and *ded1-ΔCT* cells in the late stages of oxidative stress (Figure 5B), arguing against such a role  
433 for Ded1 in SG clearance (Figure 8, #6).

434         The mechanism of Ded1 function in the stress response has yet to be fully defined. Here,  
435 we used different mutations in *DED1* and eIF4G in order to examine the molecular requirements  
436 for the various stress-responsive roles of Ded1. First, it is clear that the C-terminal region of  
437 Ded1 is critical to the stress response given the many defects observed in the *ded1-ΔCT* mutant.  
438 In order to begin to distinguish between the effects of eIF4G binding and Ded1 oligomerization,  
439 we utilized both deletions of eIF4G1 (*tif4631Δ*) and the *ded1-Δ591-604* mutant, which severely  
440 reduces eIF4G binding *in vitro* while having only a minor effect on oligomerization (32). In  
441 general, we observed defects in both growth and SG formation with these mutants (Figures 3 –  
442 6), although they were more moderate than with the full C-terminal deletion mutant.  
443 Interestingly, the *tif4631Δ ded1-ΔCT* double mutant showed similar results to the *ded1-ΔCT*  
444 mutant alone, suggesting an epistatic relationship, although interpretation of the double mutant is  
445 complicated by its growth defects even in the absence of stress. Taken together, these results  
446 indicate that eIF4G binding by Ded1 does contribute to its function in stress, which is consistent  
447 with prior studies implicating eIF4G in stress responses and in SGs (33, 45, 46). However, the  
448 more severe effects in the *ded1-ΔCT* mutant suggest that Ded1 oligomerization (or some other  
449 unknown interaction) also plays a major role, consistent with the idea that promiscuous protein-  
450 protein interactions promote SG assembly (47). Interestingly, in the overexpression model,

451 deleting most of the central helicase domain in the *ded1-Δ190-497* mutant had similar effects to  
452 wild-type *DED1* in both growth inhibition and SG formation (Figures 1 – 3). Since this mutant is  
453 predicted to lack significant enzymatic activity and RNA binding affinity, these results suggest  
454 that neither is absolutely required for these effects, at least in the overexpression model.  
455 However, this is unlikely to be the case for Ded1 translation regulation, and future studies will be  
456 required to further tease apart these mechanisms.

457         Finally, the extent to which Ded1 function in stress may be distinct in different kinds of  
458 stresses remains somewhat unclear. Several studies have now shown that Ded1 plays a role in  
459 regulating translational responses to multiple different stresses, and some aspects, such as the  
460 importance of the C-terminal region, are present in all cases to date. However, differences in  
461 Ded1 function may also be present. For example, during heat shock, a model has been proposed  
462 that as temperature rises, Ded1 condenses into SG-like structures and is not able to facilitate  
463 translation of housekeeping mRNAs with structured 5'UTRs (31). While this model is  
464 straightforward, it does not fully account for our findings here or previously in other models of  
465 stress, including the effects of *ded1* mutants on translation and SG assembly in different stresses  
466 as well as the effects of interaction with eIF4G (Figures 3, 5, 7 and (32)). As another example of  
467 the diversity of stress responses regulated by Ded1, our previous study showed that Ded1 plays a  
468 role in the response to a stress that does not induce SGs (pharmacological inhibition of TOR)  
469 (32). Furthermore, the precise subsets of mRNAs dependent on Ded1 are likely to be different in  
470 different stresses, given the need to respond to specific cellular conditions (oxidative imbalance,  
471 nutrient deprivation, heat shock, etc.). Here, the framework presented in Figure 8 is intended to  
472 be inclusive, and individual stresses might include or exclude various specific roles. Future  
473 studies will be needed to further delineate these mechanisms, particularly as the complexity of

474 Ded1 function will likely have important implications for pathologies such as cancer and aging,  
475 where dysregulation of stress responses contributes to disease progression.

476

## 477 **Materials and Methods:**

478 Yeast strains and plasmids: Yeast strains and plasmids used are listed in Supplemental Tables S2  
479 and S3. Strains containing different *ded1* mutants under the control of the endogenous *DED1*  
480 promoter were created by plasmid shuffle starting with strain SWY4093 (*ded1::KAN*  
481 *+pCEN/URA3/DED1*) or strain TBY134 (*ded1::KAN, tif4631::HYG + pCEN/URA3/DED1*).  
482 Strains that conditionally overexpressed wild-type *DED1* or *ded1* deletion mutants were created  
483 by transforming strain TBY121 (*ded1::KAN + pCEN/LEU2/ded1-ΔCT*), SWY4093, or TBY134  
484 with plasmids that expressed *DED1* or the indicated *ded1* mutant under the control of the  
485 *GAL1/10* promoter, plus a plasmid that constitutively expressed *PABI-GFP* where indicated.  
486 Plasmids for galactose-inducible overexpression of untagged *DED1*, *ded1-ΔCT* or *ded1-Δ14aa*  
487 proteins (*ded1-Δ535-548*, *-Δ549-562*, *-Δ563-576*, *-Δ577-590*, and *-Δ591-604*) were constructed  
488 as follows: pTB137 was constructed by inversion of the *XhoI* fragment containing the *GAL-*  
489 *DED1-HHA* sequence in pRP2086 (encoding the Ded1-His-HA-ProtA fusion protein) relative to  
490 the vector backbone. Then, untagged *GAL-DED1* (pTB138), *GAL-ded1-ΔCT* (pTB148) and  
491 *GAL-ded1-Δ14aa* (pTB139 through pTB143) plasmids were constructed by replacing pTB137  
492 sequence downstream of the internal *BamHI* site at nt333 of the *DED1* coding sequence with the  
493 analogous sequence from plasmids pSW3619, pTB136, or pTB111 through pTB115,  
494 respectively (32, 48). Plasmid pTB144, for galactose-inducible expression of *ded1-Δ190-497*,  
495 was constructed as follows: pTB138 was digested with *AgeI* (sites at nt564 and nt1488 of the

496 *DED1* coding sequence) and the plasmid backbone plus the *DED1* N- and C-termini sequences  
497 was isolated and re-ligated, resulting in an in-frame deletion.

498

499 Growth assays: All yeast cultures were incubated at 30°C. Serial dilution growth assays were  
500 performed as previously described (26). To analyze growth under conditions of *DED1* or *ded1*  
501 mutant overexpression, cells were pre-grown in selective SD liquid medium containing 2%  
502 sucrose, serially diluted 5-fold in SD medium, and spotted on selective SD solid medium  
503 containing 2% galactose or 2% dextrose (as control). Micro-well growth curves were generated  
504 by growing yeast cultures in YPD overnight in 96-well plates (Costar 96-well flat-bottom). For  
505 each strain 5-8 biological replicates were grown in parallel. Cells were back-diluted to OD<sub>600nm</sub>  
506 of 0.1 and allowed to grow to mid-log phase. 20 µl of mid-log culture was added to 180 µl of  
507 fresh YPD with or without 0.8 mM H<sub>2</sub>O<sub>2</sub> (Beantown Chemical, Hudson, NH) in 96-well plates.  
508 Plates were incubated at 30°C with shaking at 400 rpm to reduce cell settling. OD<sub>600nm</sub>  
509 measurements were obtained at various timepoints with a VERSAmax microplate reader using  
510 SOFTmax Pro 3.1 software. For determination of growth parameters, data points were curve-  
511 fitted using Graphpad Prism to a re-parameterized form of the Gompertz growth equation (34):

512 
$$y = Ae^{-e^{-\frac{\mu_{max} \cdot e}{A}(\lambda - t) + 1}}$$

513 This yielded lag phase duration ( $\lambda$ ) and maximal growth rate ( $\mu_{max}$ ) values for each strain and  
514 condition, reported in Supplemental Table S1, and statistical significance was determined by the  
515 extra sum-of-squares F-test.

516

517 Western blotting: For analysis of Ded1 and eIF4G1 protein levels during overexpression of  
518 *DED1* or *ded1* mutant constructs, cells were grown as described for granule analysis by

519 fluorescence microscopy, and crude cell lysates were prepared by lysis in 1.85 M NaOH and  
520 7.4%  $\beta$ -mercaptoethanol followed by trichloroacetic acid precipitation (26). Proteins were  
521 separated by SDS-PAGE, blotted, and probed with antibodies specific for Ded1 (VU318,  
522 described in (48)), eIF4G1 (gift from R. Parker (49)), Pgk1 (Life Technologies) or Pab1 (Santa  
523 Cruz). HRP-conjugated secondary antibodies were used to visualize chemiluminescent bands on  
524 a Sapphire biomolecular imager (Azure Biosystems). Ded1 band intensity was measured by  
525 densitometry using ImageJ/Fiji software and was normalized to Pgk1 band intensity in the same  
526 sample. Statistical significance was determined via Student's t-test.

527  
528 Granule analysis by fluorescence microscopy: For stress granule analysis, the indicated strains  
529 were transformed with plasmids that expressed *PABI-GFP* alone (pRB16) or both *PABI-GFP*  
530 and *EDC3-mCherry* (pRP1657). For analysis of Pab1-GFP granules induced by *DED1* or *ded1*  
531 mutant overexpression, cells were cultured in selective SD media containing 2% sucrose at 30°C,  
532 back-diluted to  $OD_{600nm} = 0.10-0.15$  in selective SD media containing 1.75% galactose + 0.25%  
533 sucrose, and cultured at 30°C for an additional 6 (TBY121-based strains) or 7 hours (SWY4093  
534 and TBY134-based strains) prior to imaging. For analysis of Pab1-GFP granules induced by  
535  $H_2O_2$ , strains were grown to  $OD_{600nm} = 0.2-0.4$  in SD -Leu and then treated with 0.75 mM  $H_2O_2$   
536 for the indicated times. Images were captured using a DeltaVision Elite inverted microscope  
537 (Applied Precision/GE Healthcare) with an Olympus 100 $\times$  plan apo NA 1.4 objective and  
538 appropriate filter sets. Z-series datasets were collected with a pco.edge sCMOS camera at a step  
539 size of 0.4  $\mu m$ . Post-acquisition deconvolution was performed using SoftWorx software (Applied  
540 Precision). Z-series processing, quantitation and cropping were completed in ImageJ/Fiji; sizing  
541 and brightness adjustment were completed in Adobe Photoshop. To determine the percentage of



542 cells with Pab1-GFP granules, the Image J/Fiji “Cell Counter” plug-in was used to track manual  
543 counts of the total number of cells, and the number of cells containing at least one Pab1-GFP  
544 focus, in merged Z-series, deconvolved images. Reported numbers for each strain undergoing  
545 either galactose induction or H<sub>2</sub>O<sub>2</sub> treatment for the noted time represent a mean of  $\geq 3$  biological  
546 replicates. A minimum of 100 cells (mean of  $>300$  cells) were scored for each replicate.  
547 Statistical significance was determined by Student’s t-test or ANOVA as appropriate.

548

549 H<sub>2</sub>O<sub>2</sub> growth/viability assays: All yeast cultures were grown to mid-log phase at 30°C in SD -  
550 Leu medium. Cultures were untreated or treated with 0.75 mM H<sub>2</sub>O<sub>2</sub> and incubated at 30°C with  
551 shaking at 190 rpm for 6 hours. Cells were spun down and washed in SD -Leu medium and  
552 resuspended to a concentration of  $1 \times 10^6$  cells/ml. Two-fold serial dilutions were plated on 15cm  
553 SD -Leu agar plates. Plates were scanned after 2 and 3 days of incubation at 30°C. Cell viability  
554 was measured by counting yeast colonies in 2-fold serial dilution spots after 3 days of recovery.  
555 Fiji software was used to count colonies in serial dilution spots where individual colonies were  
556 clearly distinguishable, and colony-forming units (CFU) were calculated. The strain viability was  
557 determined by averaging normalized CFU from a minimum of 3 spots in the same dilution series  
558 for each experiment. Strain viability shown was averaged from 4 independent serial dilution  
559 experiments, and statistical significance was determined by one-way ANOVA.

560

561 Translation scanning assays: Scanning assays for structured 5’UTR sequences were carried out  
562 similarly to (36). Briefly, cells transformed with either the control unstructured 5’UTR-firefly  
563 luciferase reporter (pFJZ342) or the stem-loop-containing 5’UTR-firefly luciferase reporter  
564 (pFJZ623) were cultured in triplicate in selective SD media at 30°C. H<sub>2</sub>O<sub>2</sub> was added to a final

565 concentration of 0.75 mM. Cell lysates were generated at various timepoints via bead beater in  
566 luciferase lysis buffer (25 mM Tris phosphate pH 7.8, 2 mM EGTA, 2 mM DTT, 0.5% Triton X-  
567 100, 10% glycerol). Luciferase assays were performed using a standard luciferin reagent  
568 (Promega) on a Glomax 20/20 luminometer (Promega). For each biological replicate, values  
569 obtained from the triplicate cultures were normalized to cell concentration and averaged.  
570 Statistical significance was determined by Student's t-test.

571

### 572 **Acknowledgments:**

573 The authors would like to thank J. Ross Buchan, Roy Parker, Angela Hilliker, and Alan  
574 Hinnebusch for reagents, and members of the Bolger and Buchan laboratories for helpful advice  
575 and discussions. This work was supported by the National Institutes of Health (1R01-  
576 GM136827) and the American Cancer Society (RSG-1326301-RMC).

577

### 578 **References:**

- 579 1. Saavedra C, Tung KS, Amberg DC, Hopper AK, Cole CN. 1996. Regulation of mRNA  
580 export in response to stress in *Saccharomyces cerevisiae*. *Genes Dev* 10:1608-1620.
- 581 2. Albig AR, Decker CJ. 2001. The target of rapamycin signaling pathway regulates mRNA  
582 turnover in the yeast *Saccharomyces cerevisiae*. *Mol Biol Cell* 12:3428-3438.
- 583 3. Liu B, Qian SB. 2014. Translational reprogramming in cellular stress response. *Wiley*  
584 *Interdiscip Rev RNA* 5:301-315.
- 585 4. Pakos-Zebrucka K, Koryga I, Mnich K, Ljujic M, Samali A, Gorman AM. 2016. The  
586 integrated stress response. *EMBO Rep* 17:1374-1395.

- 587 5. Saxton RA, Sabatini DM. 2017. mTOR Signaling in Growth, Metabolism, and Disease.  
588 Cell 168:960-976.
- 589 6. Crawford RA, Pavitt GD. 2019. Translational regulation in response to stress in  
590 *Saccharomyces cerevisiae*. *Yeast* 36:5-21.
- 591 7. Ingolia NT, Ghaemmaghami S, Newman JR, Weissman JS. 2009. Genome-wide analysis  
592 in vivo of translation with nucleotide resolution using ribosome profiling. *Science*  
593 324:218-223.
- 594 8. Gerashchenko MV, Lobanov AV, Gladyshev VN. 2012. Genome-wide ribosome  
595 profiling reveals complex translational regulation in response to oxidative stress. *Proc*  
596 *Natl Acad Sci U S A* 109:17394-17399.
- 597 9. Guzikowski AR, Chen YS, Zid BM. 2019. Stress-induced mRNP granules: Form and  
598 function of processing bodies and stress granules. *Wiley Interdiscip Rev RNA* 10:e1524.
- 599 10. Van Treeck B, Parker R. 2018. Emerging Roles for Intermolecular RNA-RNA  
600 Interactions in RNP Assemblies. *Cell* 174:791-802.
- 601 11. Ivanov P, Kedersha N, Anderson P. 2019. Stress Granules and Processing Bodies in  
602 Translational Control. *Cold Spring Harb Perspect Biol* 11.
- 603 12. Khong A, Matheny T, Jain S, Mitchell SF, Wheeler JR, Parker R. 2017. The Stress  
604 Granule Transcriptome Reveals Principles of mRNA Accumulation in Stress Granules.  
605 *Mol Cell* 68:808-820 e805.
- 606 13. Moon SL, Morisaki T, Khong A, Lyon K, Parker R, Stasevich TJ. 2019. Multicolour  
607 single-molecule tracking of mRNA interactions with RNP granules. *Nat Cell Biol*  
608 21:162-168.

- 609 14. Wilbertz JH, Voigt F, Horvathova I, Roth G, Zhan Y, Chao JA. 2019. Single-Molecule  
610 Imaging of mRNA Localization and Regulation during the Integrated Stress Response.  
611 Mol Cell 73:946-958 e947.
- 612 15. Mateju D, Eichenberger B, Voigt F, Eglinger J, Roth G, Chao JA. 2020. Single-Molecule  
613 Imaging Reveals Translation of mRNAs Localized to Stress Granules. Cell 183:1801-  
614 1812 e1813.
- 615 16. Sharma D, Jankowsky E. 2014. The Ded1/DDX3 subfamily of DEAD-box RNA  
616 helicases. Crit Rev Biochem Mol Biol 49:343-360.
- 617 17. Shen L, Pelletier J. 2020. General and Target-Specific DExD/H RNA Helicases in  
618 Eukaryotic Translation Initiation. Int J Mol Sci 21.
- 619 18. Linder P, Jankowsky E. 2011. From unwinding to clamping - the DEAD box RNA  
620 helicase family. Nat Rev Mol Cell Biol 12:505-516.
- 621 19. Hilliker A, Gao Z, Jankowsky E, Parker R. 2011. The DEAD-Box Protein Ded1  
622 Modulates Translation by the Formation and Resolution of an eIF4F-mRNA Complex.  
623 Mol Cell 43:962-972.
- 624 20. Senissar M, Le Saux A, Belgareh-Touze N, Adam C, Banroques J, Tanner NK. 2014.  
625 The DEAD-box helicase Ded1 from yeast is an mRNP cap-associated protein that  
626 shuttles between the cytoplasm and nucleus. Nucleic Acids Res 42:10005-10022.
- 627 21. Putnam AA, Gao Z, Liu F, Jia H, Yang Q, Jankowsky E. 2015. Division of Labor in an  
628 Oligomer of the DEAD-Box RNA Helicase Ded1p. Mol Cell 59:541-552.
- 629 22. Gao Z, Putnam AA, Bowers HA, Guenther UP, Ye X, Kindsfather A, Hilliker AK,  
630 Jankowsky E. 2016. Coupling between the DEAD-box RNA helicases Ded1p and eIF4A.  
631 Elife 5.

- 632 23. Gulay S, Gupta N, Lorsch JR, Hinnebusch AG. 2020. Distinct interactions of eIF4A and  
633 eIF4E with RNA helicase Ded1 stimulate translation in vivo. *Elife* 9.
- 634 24. Sen ND, Zhou F, Ingolia NT, Hinnebusch AG. 2015. Genome-wide analysis of  
635 translational efficiency reveals distinct but overlapping functions of yeast DEAD-box  
636 RNA helicases Ded1 and eIF4A. *Genome Res* 25:1196-1205.
- 637 25. Guenther UP, Weinberg DE, Zubradt MM, Tedeschi FA, Stawicki BN, Zagore LL, Brar  
638 GA, Licatalosi DD, Bartel DP, Weissman JS, Jankowsky E. 2018. The helicase Ded1p  
639 controls use of near-cognate translation initiation codons in 5' UTRs. *Nature* 559:130-  
640 134.
- 641 26. Aryanpur PP, Regan CA, Collins JM, Mittelmeier TM, Renner DM, Vergara AM, Brown  
642 NP, Bolger TA. 2017. Gle1 regulates RNA binding of the DEAD-box helicase Ded1 in  
643 its complex role in translation initiation. *Mol Cell Biol* doi:10.1128/MCB.00139-17.
- 644 27. Gupta N, Lorsch JR, Hinnebusch AG. 2018. Yeast Ded1 promotes 48S translation pre-  
645 initiation complex assembly in an mRNA-specific and eIF4F-dependent manner. *Elife* 7.
- 646 28. Shih JW, Wang WT, Tsai TY, Kuo CY, Li HK, Wu Lee YH. 2012. Critical roles of RNA  
647 helicase DDX3 and its interactions with eIF4E/PABP1 in stress granule assembly and  
648 stress response. *Biochem J* 441:119-129.
- 649 29. Jain S, Wheeler JR, Walters RW, Agrawal A, Barsic A, Parker R. 2016. ATPase-  
650 Modulated Stress Granules Contain a Diverse Proteome and Substructure. *Cell* 164:487-  
651 498.
- 652 30. Hondele M, Sachdev R, Heinrich S, Wang J, Vallotton P, Fontoura BMA, Weis K. 2019.  
653 DEAD-box ATPases are global regulators of phase-separated organelles. *Nature*  
654 573:144-148.

- 655 31. Iserman C, Desroches Altamirano C, Jegers C, Friedrich U, Zarin T, Fritsch AW,  
656 Mittasch M, Domingues A, Hersemann L, Jahnel M, Richter D, Guenther UP, Hentze  
657 MW, Moses AM, Hyman AA, Kramer G, Kreysing M, Franzmann TM, Alberti S. 2020.  
658 Condensation of Ded1p Promotes a Translational Switch from Housekeeping to Stress  
659 Protein Production. *Cell* 181:818-831 e819.
- 660 32. Aryanpur PP, Renner DM, Rodela E, Mittelmeier TM, Byrd A, Bolger TA. 2019. The  
661 DEAD-box RNA helicase Ded1 has a role in the translational response to TORC1  
662 inhibition. *Mol Biol Cell* 30:2171-2184.
- 663 33. Buchan JR, Muhlrads D, Parker R. 2008. P bodies promote stress granule assembly in  
664 *Saccharomyces cerevisiae*. *J Cell Biol* 183:441-455.
- 665 34. Zwietering MH, Jongenburger I, Rombouts FM, van 't Riet K. 1990. Modeling of the  
666 bacterial growth curve. *Appl Environ Microbiol* 56:1875-1881.
- 667 35. Shenton D, Smirnova JB, Selley JN, Carroll K, Hubbard SJ, Pavitt GD, Ashe MP, Grant  
668 CM. 2006. Global translational responses to oxidative stress impact upon multiple levels  
669 of protein synthesis. *J Biol Chem* 281:29011-29021.
- 670 36. Brown NP, Vergara AM, Whelan AB, Guerra P, Bolger TA. 2021. Medulloblastoma-  
671 associated mutations in the DEAD-box RNA helicase DDX3X/DED1 cause specific  
672 defects in translation. *J Biol Chem* doi:10.1016/j.jbc.2021.100296:100296.
- 673 37. Beckham C, Hilliker A, Cziko AM, Noueiry A, Ramaswami M, Parker R. 2008. The  
674 DEAD-box RNA helicase Ded1p affects and accumulates in *Saccharomyces cerevisiae*  
675 P-bodies. *Mol Biol Cell* 19:984-993.
- 676 38. Putnam AA, Jankowsky E. 2013. AMP sensing by DEAD-box RNA helicases. *J Mol*  
677 *Biol* 425:3839-3845.

- 678 39. Buchan JR, Parker R. 2009. Eukaryotic stress granules: the ins and outs of translation.  
679 Mol Cell 36:932-941.
- 680 40. Richter K, Haslbeck M, Buchner J. 2010. The heat shock response: life on the verge of  
681 death. Mol Cell 40:253-266.
- 682 41. Advani VM, Ivanov P. 2019. Translational Control under Stress: Reshaping the  
683 Translatome. Bioessays 41:e1900009.
- 684 42. Cui BC, Sikirzhyski V, Aksenova M, Lucius MD, Levon GH, Mack ZT, Pollack C,  
685 Odhiambo D, Broude E, Lizarraga SB, Wyatt MD, Shtutman M. 2020. Pharmacological  
686 inhibition of DEAD-Box RNA Helicase 3 attenuates stress granule assembly. Biochem  
687 Pharmacol 182:114280.
- 688 43. Lai MC, Lee YH, Tarn WY. 2008. The DEAD-box RNA helicase DDX3 associates with  
689 export messenger ribonucleoproteins as well as Tip-associated protein and participates in  
690 translational control. Mol Biol Cell 19:3847-3858.
- 691 44. Buchan JR. 2014. mRNP granules. Assembly, function, and connections with disease.  
692 RNA Biol 11:1019-1030.
- 693 45. Berset C, Trachsel H, Altmann M. 1998. The TOR (target of rapamycin) signal  
694 transduction pathway regulates the stability of translation initiation factor eIF4G in the  
695 yeast *Saccharomyces cerevisiae*. Proc Natl Acad Sci U S A 95:4264-4269.
- 696 46. Kelly SP, Bedwell DM. 2015. Both the autophagy and proteasomal pathways facilitate  
697 the Ubp3p-dependent depletion of a subset of translation and RNA turnover factors  
698 during nitrogen starvation in *Saccharomyces cerevisiae*. RNA 21:898-910.
- 699 47. Tauber D, Tauber G, Parker R. 2020. Mechanisms and Regulation of RNA Condensation  
700 in RNP Granule Formation. Trends Biochem Sci 45:764-778.

- 701 48. Bolger TA, Wente SR. 2011. Gle1 is a multifunctional DEAD-box protein regulator that  
702 modulates Ded1 in translation initiation. *J Biol Chem* 286:39750-39759.
- 703 49. Poornima G, Shah S, Vignesh V, Parker R, Rajyaguru PI. 2016. Arginine methylation  
704 promotes translation repression activity of eIF4G-binding protein, Scd6. *Nucleic Acids*  
705 *Res* 44:9358-9368.

706

707 **Figure Legends:**

708 **Figure 1:** *Growth inhibition by DED1 overexpression correlates with Ded1 protein levels and*  
709 *requires the C-terminal region.* (A) Domain map of the Ded1 protein illustrating the N- and C-  
710 terminal low-complexity regions (NT and CT, respectively) and the boundaries of five sequential  
711 deletions of 14 residues within the CT analyzed in this study. (B) Five-fold serial dilutions of  
712 *ded1-ΔCT* cells with galactose-inducible wild-type *DED1* spotted on selective medium  
713 containing either galactose or glucose. Cells harbored a single plasmid that encoded wild-type  
714 Ded1 with a C-terminal tag (*DED1-HHA*), a single plasmid encoding untagged Ded1 (*DED1/H*  
715 or *DED1/T*), or two plasmids that each encoded untagged Ded1 (*DED1/H + DED1/T*). (C)  
716 Western blot analysis of protein extracts from *ded1-ΔCT* cells containing the indicated plasmid,  
717 induced for 7 hours. Samples were probed with antibodies specific for Ded1 or Pgk1 (as a  
718 loading control). (D) Five-fold serial dilutions of *ded1-ΔCT* cells with galactose-inducible *DED1*  
719 or *ded1* mutants spotted on selective medium containing either galactose or glucose. (E) Five-  
720 fold serial dilutions of *ded1-ΔCT* cells containing galactose-inducible *DED1* (*DED1/T*) plus a  
721 second galactose-inducible construct as indicated, spotted on selective medium containing either  
722 galactose or glucose.

723



724 **Figure 2:** *The Ded1 C-terminus is required for formation of GAL-DED1-induced granules.* (A)

725 Live-cell microscopy showing Pab1-GFP granules in *ded1-ΔCT* cells expressing galactose-  
726 inducible wild-type *DED1* from a single plasmid construct (*DED1*), two inducible constructs  
727 (*DED1/H + DED1/T*), or the indicated *ded1* deletion mutant constructs. Cells were grown in  
728 liquid medium containing galactose for 7 hours before imaging. Scale bar = 2 μm. (B)  
729 Quantitation of the presence of Pab1-GFP granules as the percentage of cells that contained  
730 GFP-positive foci. Mean and SEM of 3-11 replicates are shown. Statistical significance was  
731 determined using Student's t-test (unpaired; \*  $p < 0.05$ , \*\*  $p < 0.01$ ).

732

733 **Figure 3:** *Deletion of eIF4G1 has moderate effects on GAL-DED1-induced growth inhibition*

734 *and granule formation.* (A) Five-fold serial dilutions of wild-type *TIF4631* (eIF4G1) or *tif4631Δ*  
735 (eIF4G1-null) cells with galactose-inducible wild-type *DED1*, *ded1-ΔCT*, or *ded1-Δ591-604*  
736 spotted on selective medium containing either galactose or glucose. Galactose plates were  
737 imaged after 2 days (*left*) or 4 days (*middle*) growth. (B) Live-cell microscopy of Pab1-GFP  
738 granules in *TIF4631* or *tif4631Δ* cells expressing galactose-inducible *DED1* or *ded1* deletion  
739 mutant constructs. Cells were grown in liquid medium containing galactose for 7 hours before  
740 imaging. Scale bar = 2 μm. (C) Quantitation of the presence of Pab1-GFP granules as the  
741 percentage of cells that contained Pab1-GFP foci. Mean and SEM of 3-7 replicates are shown.  
742 Statistical significance was determined using Student's t-test (unpaired; \*  $p < 0.05$ , \*\*\*  $p <$   
743  $0.001$ ).

744

745 **Figure 4:** *Ded1 promotes cell survival and growth during oxidative stress.* (A) Growth curve

746 analysis of *DED1*, *ded1-Δ591-604* and *ded1-ΔCT* strains in rich media, untreated (left) and

747 treated with 0.8 mM H<sub>2</sub>O<sub>2</sub> (right). Time points were fitted to the Gompertz growth equation (see  
748 Supplemental Table S1). Each time point shows the mean and SEM of 8 biological replicates  
749 performed in parallel. (B) Growth recovery of *DED1*, *ded1-Δ591-604* and *ded1-ΔCT* strains  
750 treated for 6 hours with 0.8 mM H<sub>2</sub>O<sub>2</sub>. A two-fold serial dilution series was performed, and cells  
751 were plated on plates lacking H<sub>2</sub>O<sub>2</sub> and incubated for 2 or 3 days as shown. Untreated cells were  
752 diluted and plated in parallel. (C) Cell survival following 6 hours of treatment with 0.8 mM  
753 H<sub>2</sub>O<sub>2</sub>. Colony-forming units were calculated from dilutions of untreated and H<sub>2</sub>O<sub>2</sub>-treated *DED1*,  
754 *ded1-Δ591-604* and *ded1-ΔCT* cells after 3 days. CFUs in untreated cells are shown normalized  
755 to *DED1* to show that plating efficiency does not significantly differ between strains (left). Cell  
756 survival after treatment is shown relative to untreated CFUs for each strain (right). Data  
757 represent the mean and SEM of 4 biological replicates. Statistical significance was determined  
758 using one-way ANOVA (\* p < 0.05).

759

760 **Figure 5:** *Ded1* regulates stress granule dynamics in oxidative stress. (A) Representative images  
761 of *DED1* and *ded1-ΔCT* strains expressing a Pab1-GFP reporter, after 0, 4, 8, 12, 16 and 20  
762 hours of treatment with 0.75 mM H<sub>2</sub>O<sub>2</sub>. (B) Quantitation of Pab1-GFP foci during H<sub>2</sub>O<sub>2</sub> time  
763 course in (A). (C) Pab1-GFP foci quantitation in *DED1*, *ded1-Δ591-604* and *ded1-ΔCT* strains  
764 after 12 hours of treatment with 0.75 mM H<sub>2</sub>O<sub>2</sub>. Mean and SEM of 3-4 biological replicates are  
765 shown. Statistical significance was determined using one-way ANOVA (\*\* p < 0.01).

766

767 **Figure 6:** *Ded1* interaction with *eIF4G* affects its role in oxidative stress. (A) Gompertz growth  
768 curve analysis of *DED1*, *ded1-ΔCT*, *tif4631Δ* and *tif4631Δ ded1-ΔCT* strains treated with 0.8  
769 mM H<sub>2</sub>O<sub>2</sub> (see also Supplemental Table S1). Each time point shows the mean and SEM of 5

770 biological replicates performed in parallel. (B) Representative images of *DED1*, *ded1-ΔCT*,  
771 *tif4631Δ* and *tif4631Δ ded1-ΔCT* strains expressing a Pab1-GFP reporter after 12 hours of  
772 treatment with 0.75 mM H<sub>2</sub>O<sub>2</sub>. (C) Quantitation of Pab1-GFP foci in (B). Mean of 3-4 biological  
773 replicates shown with SEM. Statistical significance was determined using a one-way ANOVA (\*  
774  $p < 0.05$ , \*\*  $p < 0.01$ , \*\*\*  $p < 0.001$ ).

775

776 **Figure 7:** *Ded1* plays multiple roles in translational regulation during oxidative stress. (A)  
777 Diagram of the unstructured (*top*) and structured (*bottom*) 5'UTR firefly luciferase reporter  
778 mRNAs. The 5'UTRs are modified versions of the yeast *RPL41A* 5'UTR; a stem-loop forming  
779 sequence is inserted in the structured reporter. (B) Time course of luciferase activity in H<sub>2</sub>O<sub>2</sub>-  
780 treated cultures of *DED1* or *ded1-ΔCT* cells containing either the unstructured or structured  
781 luciferase reporter constructs diagrammed in (A). Luciferase units obtained from each culture at  
782 each time point were normalized to the luciferase units obtained from untreated *DED1* cells  
783 containing the unstructured reporter. Mean and SEM of 3-7 biological replicates are shown.  
784 Statistical significance was determined using Student's t-test (unpaired; \*  $p < 0.05$ , \*\*  $p < 0.01$ ,  
785 \*\*\*  $p < 0.001$  treated vs. untreated samples from the same strain; §  $p < 0.05$ , §§  $p < 0.01$  *ded1-*  
786 *ΔCT* vs *DED1* sample).

787

788 **Figure 8:** *Ded1* has multiple effects during cellular stress responses. A model for Ded1 function  
789 during both the initial stress response and during adaptation/recovery. Ded1 plays roles in both  
790 translation regulation and formation of SGs during the stress response, leading to growth  
791 inhibition (1, 3, & 5). Likewise, Ded1 function is important for translation upregulation in the

792 recovery phase, leading to resumption of growth (2,4). A role in SG disassembly has not been  
793 identified to date (6).

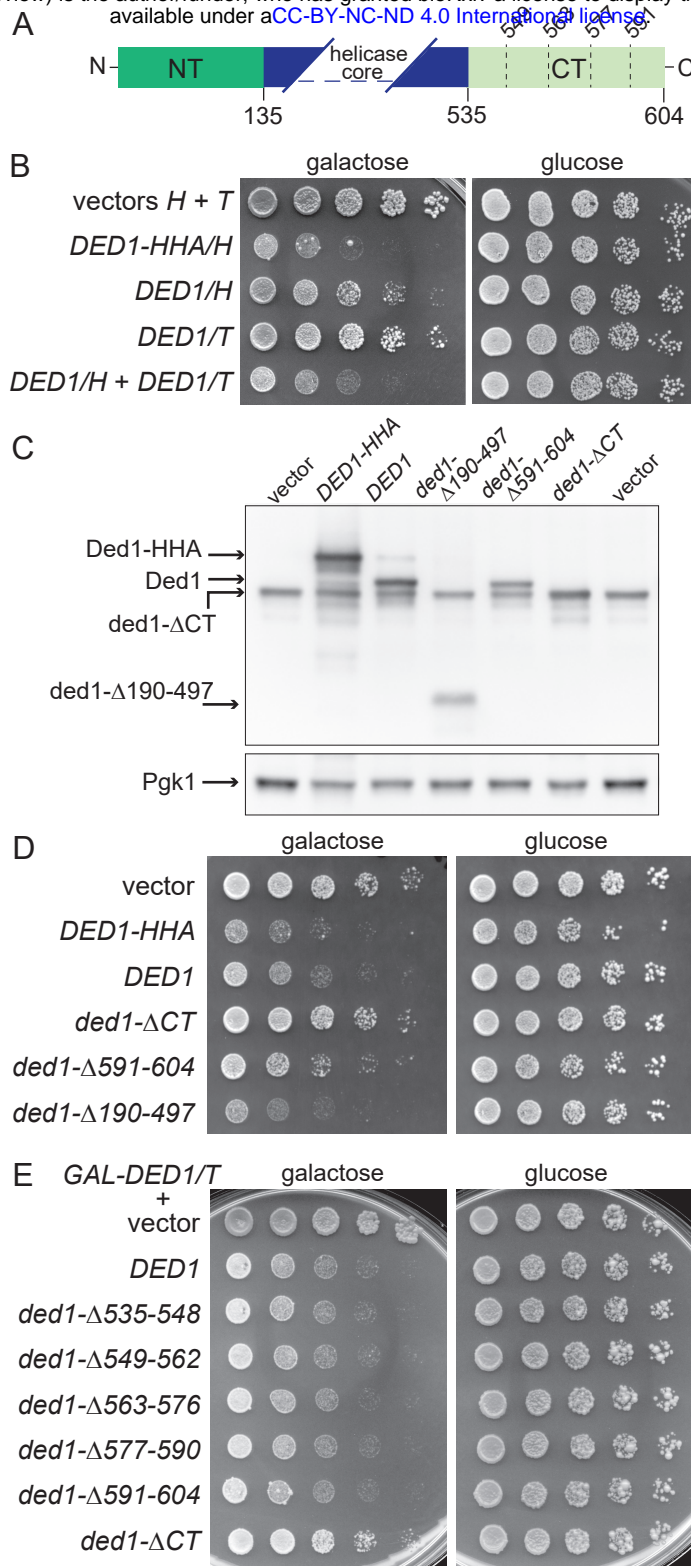

**Figure 1: Growth inhibition by *DED1* overexpression correlates with *Ded1* protein levels and requires the C-terminal region.** (A) Domain map of the *Ded1* protein illustrating the N- and C-terminal low-complexity regions (NT and CT, respectively) and the boundaries of five sequential deletions of 14 residues within the CT analyzed in this study. (B) Five-fold serial dilutions of *ded1-ΔCT* cells with galactose-inducible wild-type *DED1* spotted on selective medium containing either galactose or glucose. Cells harbored a single plasmid that encoded wild-type *Ded1* with a C-terminal tag (*DED1-HHA*), a single plasmid encoding untagged *Ded1* (*DED1/H* or *DED1/T*), or two plasmids that each encoded untagged *Ded1* (*DED1/H + DED1/T*). (C) Western blot analysis of protein extracts from *ded1-ΔCT* cells containing the indicated plasmid, induced for 7 hours. Samples were probed with antibodies specific for *Ded1* or *Pgk1* (as a loading control). (D) Five-fold serial dilutions of *ded1-ΔCT* cells with galactose-inducible *DED1* or *ded1* mutants spotted on selective medium containing either galactose or glucose. (E) Five-fold serial dilutions of *ded1-ΔCT* cells containing galactose-inducible *DED1* (*DED1/T*) plus a second galactose-inducible construct as indicated, spotted on selective medium containing either galactose or glucose.

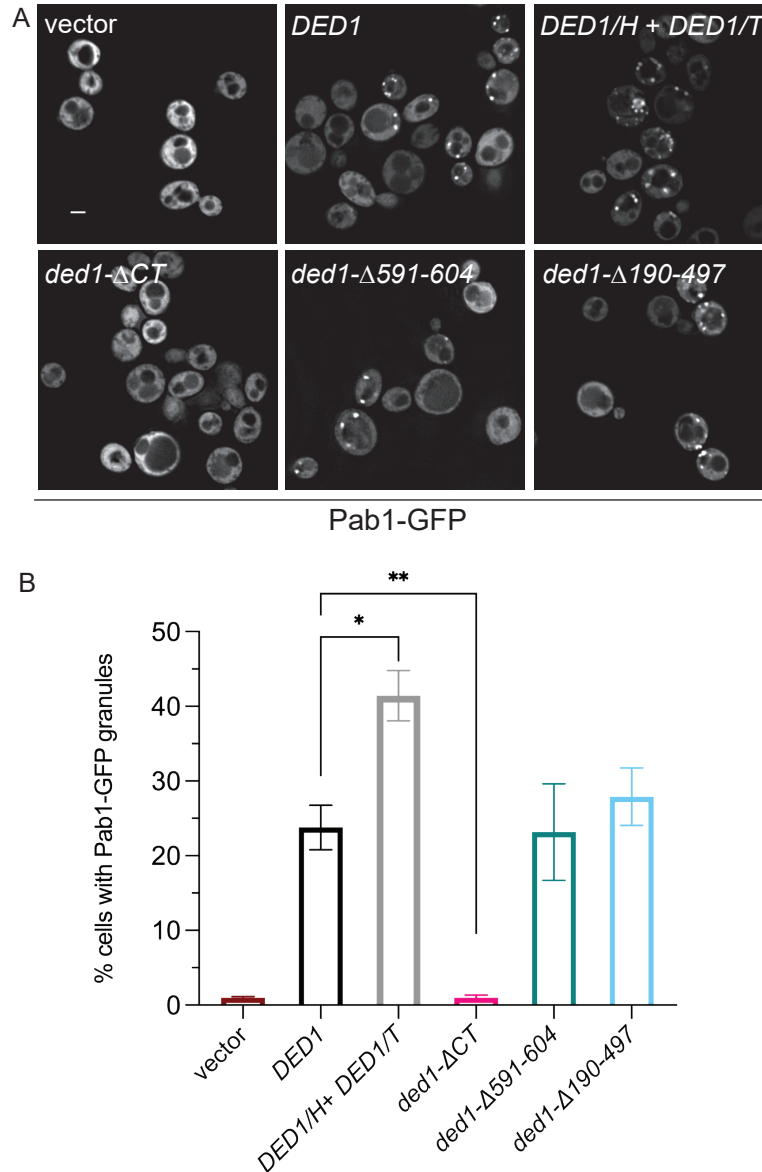

**Figure 2: The Ded1 C-terminus is required for formation of GAL-DED1-induced granules.** (A) Live-cell microscopy showing Pab1-GFP granules in *ded1-ΔCT* cells expressing galactose-inducible wild-type *DED1* from a single plasmid construct (*DED1*), two inducible constructs (*DED1/H + DED1/T*), or the indicated *ded1* deletion mutant constructs. Cells were grown in liquid medium containing galactose for 7 hours before imaging. Scale bar = 2  $\mu$ m. (B) Quantitation of the presence of Pab1-GFP granules as the percentage of cells that contained GFP-positive foci. Mean and SEM of 3-11 replicates are shown. Statistical significance was determined using Student's t-test (unpaired; \*  $p < 0.05$ , \*\*  $p < 0.01$ ).

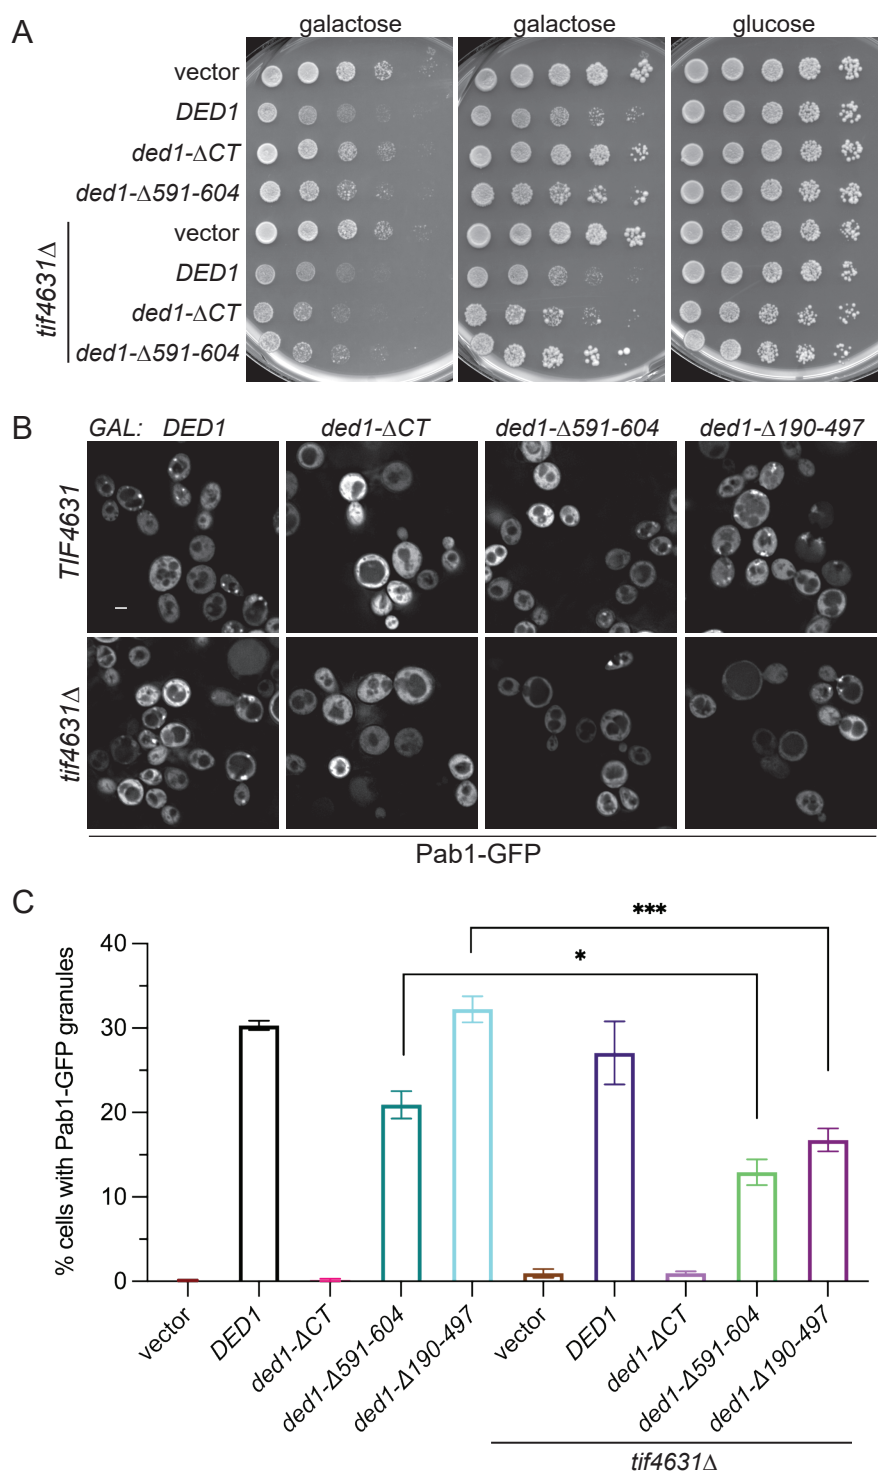

**Figure 3: Deletion of eIF4G1 has moderate effects on GAL-*DED1*-induced growth inhibition and granule formation.** (A) Five-fold serial dilutions of wild-type *TIF4631* (eIF4G1) or *tif4631Δ* (eIF4G1-null) cells with galactose-inducible wild-type *DED1*, *ded1-ΔCT*, or *ded1-Δ591-604* spotted on selective medium containing either galactose or glucose. Galactose plates were imaged after 2 days (left) or 4 days (middle) growth. (B) Live-cell microscopy of Pab1-GFP granules in *TIF4631* or *tif4631Δ* cells expressing galactose-inducible *DED1* or *ded1* deletion mutant constructs. Cells were grown in liquid medium containing galactose for 7 hours before imaging. Scale bar = 2  $\mu$ m. (C) Quantitation of the presence of Pab1-GFP granules as the percentage of cells that contained Pab1-GFP foci. Mean and SEM of 3-7 replicates are shown. Statistical significance was determined using Student's t-test (unpaired; \*  $p < 0.05$ , \*\*\*  $p < 0.001$ ).

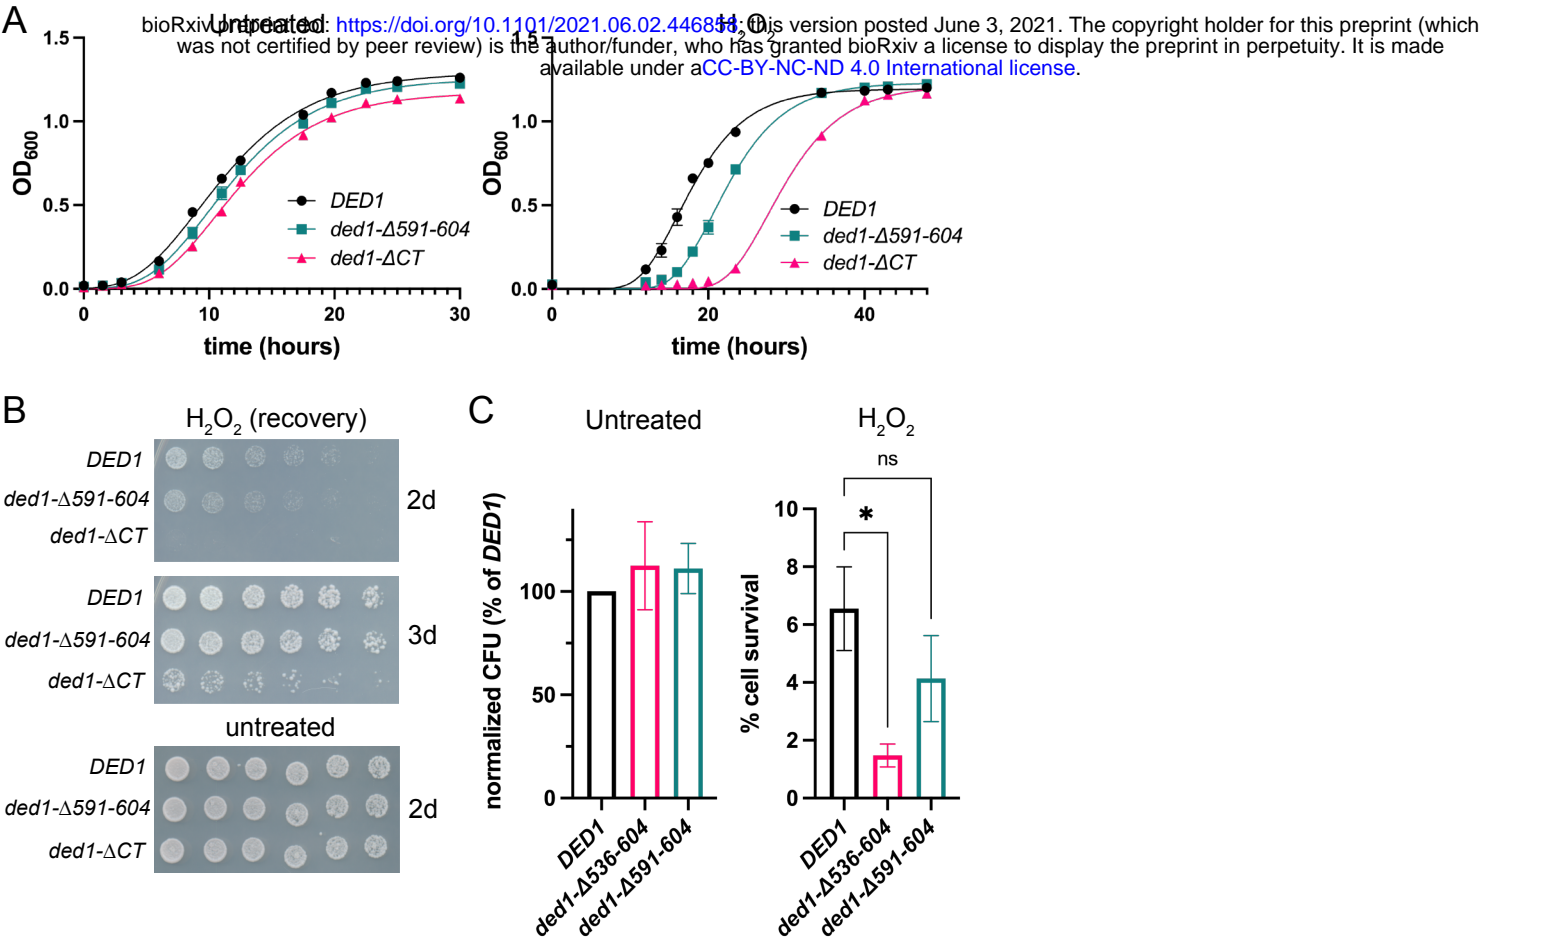

**Figure 4: *Ded1* promotes cell survival and growth during oxidative stress.** (A) Growth curve analysis of *DED1*, *ded1-Δ591-604* and *ded1-ΔCT* strains in rich media, untreated (left) and treated with 0.8 mM  $H_2O_2$  (right). Time points were fitted to the Gompertz growth equation (see Supplemental Table S1). Each time point shows the mean and SEM of 8 biological replicates performed in parallel. (B) Growth recovery of *DED1*, *ded1-Δ591-604* and *ded1-ΔCT* strains treated for 6 hours with 0.8 mM  $H_2O_2$ . A two-fold serial dilution series was performed, and cells were plated on plates lacking  $H_2O_2$  and incubated for 2 or 3 days as shown. Untreated cells were diluted and plated in parallel. (C) Cell survival following 6 hours of treatment with 0.8 mM  $H_2O_2$ . Colony-forming units were calculated from dilutions of untreated and  $H_2O_2$ -treated *DED1*, *ded1-Δ591-604* and *ded1-ΔCT* cells after 3 days. CFUs in untreated cells are shown normalized to *DED1* to show that plating efficiency does not significantly differ between strains (left). Cell survival after treatment is shown relative to untreated CFUs for each strain. Data represent the mean and SEM of 4 biological replicates. Statistical significance was determined using a one-way ANOVA test (\*  $p < 0.05$ ).



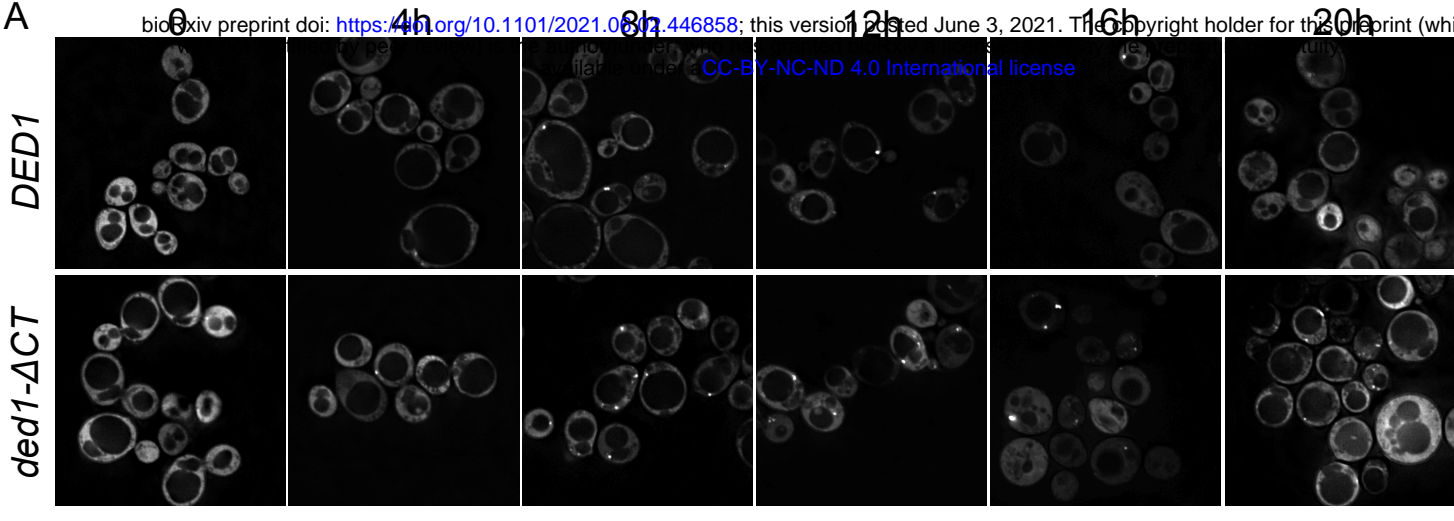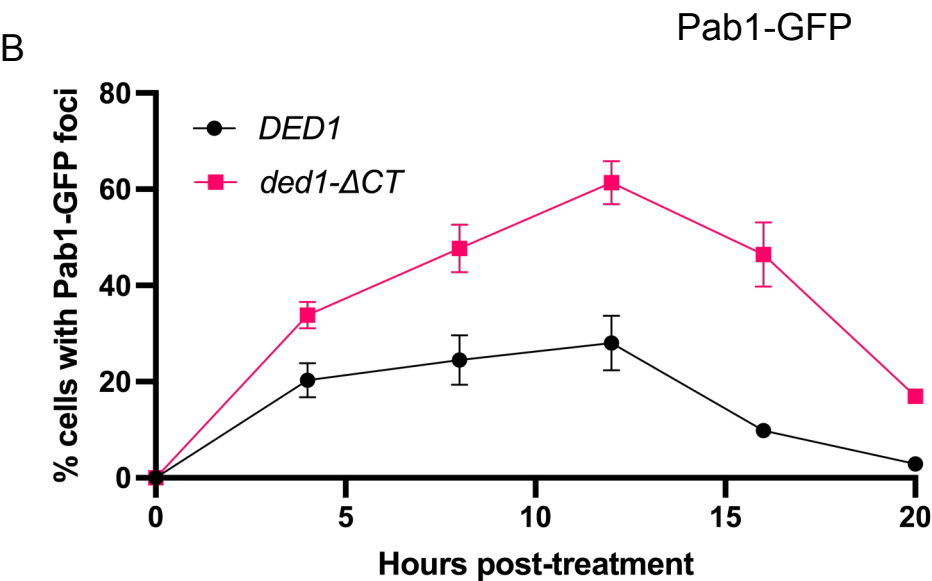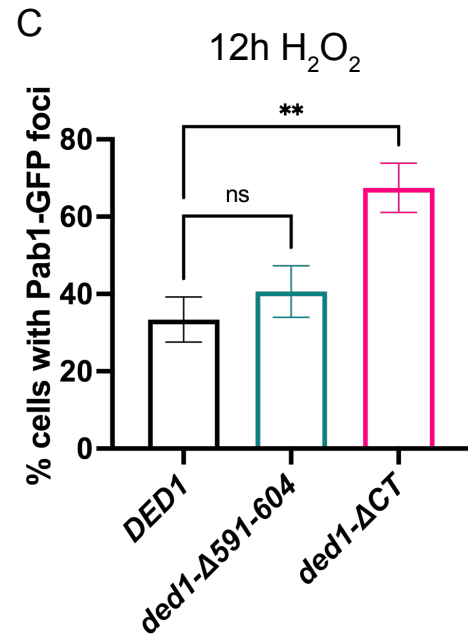

**Figure 5: *Ded1* regulates stress granule dynamics in oxidative stress.** (A) Representative images of *DED1* and *ded1-ΔCT* strains expressing a Pab1-GFP reporter, after 0, 4, 8, 12, 16 and 20 hours of treatment with 0.75 mM H<sub>2</sub>O<sub>2</sub>. (B) Quantitation of Pab1-GFP foci during H<sub>2</sub>O<sub>2</sub> time course in (A). (C) Pab1-GFP foci quantitation in *DED1*, *ded1-Δ591-604* and *ded1-ΔCT* strains after 12 hours of treatment with 0.75 mM H<sub>2</sub>O<sub>2</sub>. Mean and SEM of 3-4 biological replicates are shown. Statistical significance was determined using one-way ANOVA (\*\* p < 0.01).

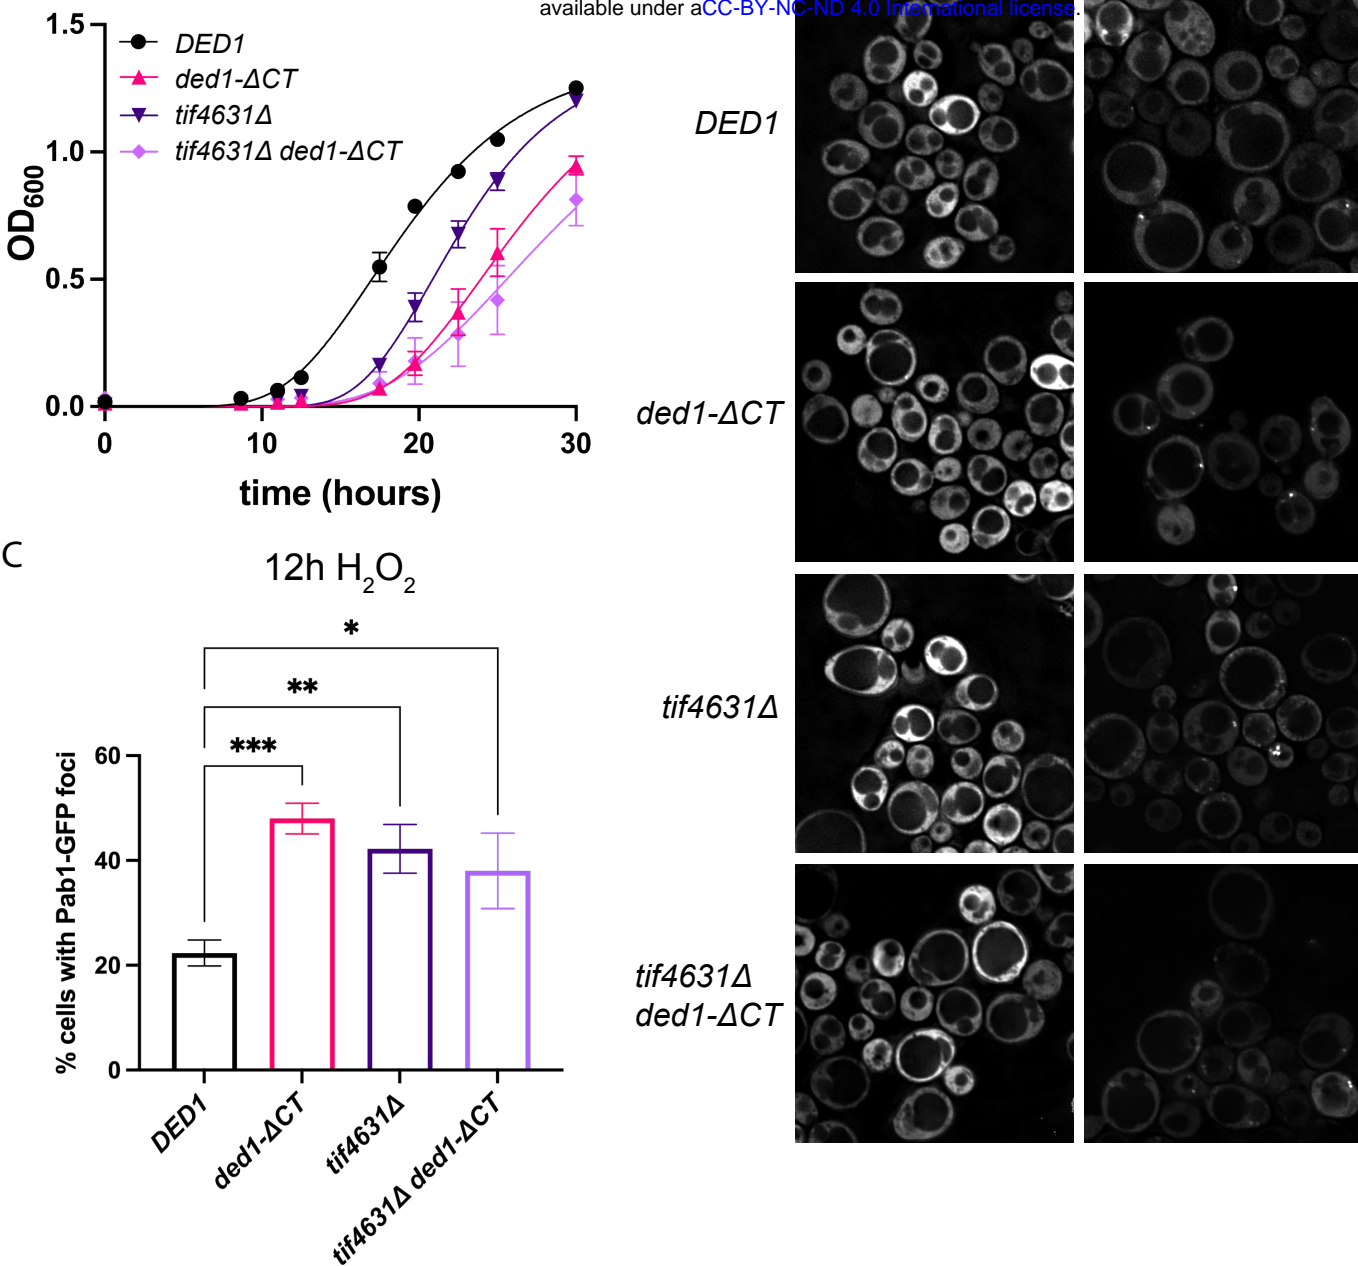

**Figure 6: Ded1 interaction with eIF4G affects its role in oxidative stress.** (A) Gompertz growth curve analysis of *DED1*, *ded1-ΔCT*, *tif4631Δ* and *tif4631Δ ded1-ΔCT* strains treated with 0.8 mM H<sub>2</sub>O<sub>2</sub> (see also Supplemental Table S1). Each time point shows the mean and SEM of 5 biological replicates performed in parallel. (B) Representative images of *DED1*, *ded1-ΔCT*, *tif4631Δ* and *tif4631Δ ded1-ΔCT* strains expressing a Pab1-GFP reporter after 12 hours of treatment with 0.75 mM H<sub>2</sub>O<sub>2</sub>. (C) Quantitation of Pab1-GFP foci in (B). Mean of 3-4 biological replicates shown with SEM. Statistical significance was determined using a one-way ANOVA (\* p < 0.05, \*\* p < 0.01, \*\*\* p < 0.001).

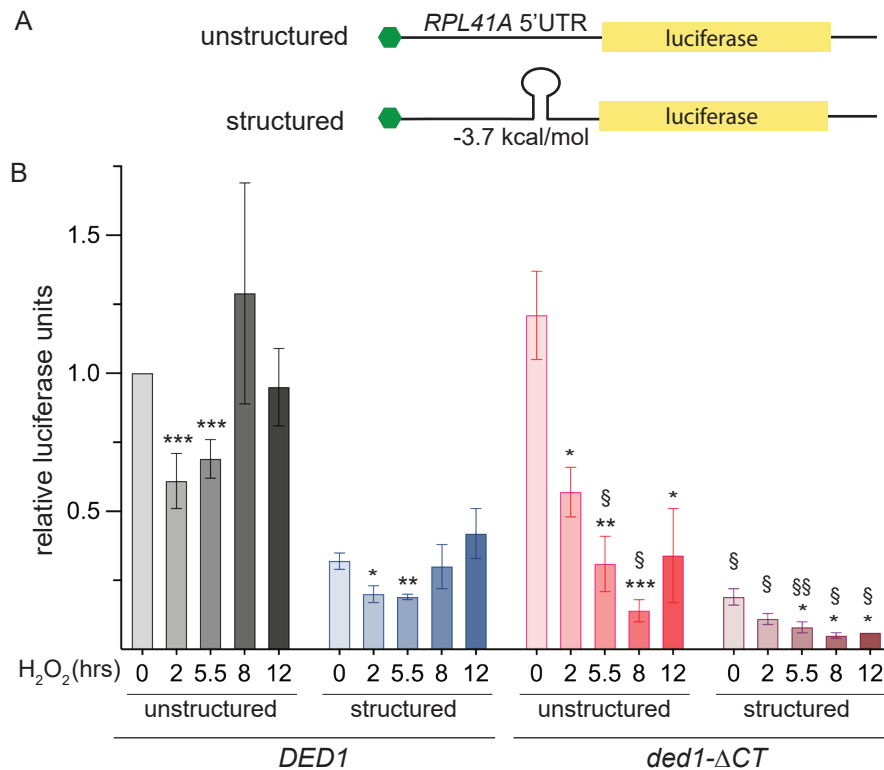

**Figure 7: *Ded1* plays multiple roles in translational regulation during oxidative stress.** (A) Diagram of the unstructured (top) and structured (bottom) 5'UTR firefly luciferase reporter mRNAs. The 5'UTRs are modified versions of the yeast *RPL41A* 5'UTR; a stem-loop forming sequence is inserted in the structured reporter. (B) Time course of luciferase activity in  $H_2O_2$ -treated cultures of *DED1* or *ded1-ΔCT* cells containing either the unstructured or structured luciferase reporter constructs diagrammed in (A). Luciferase units obtained from each culture at each time point were normalized to the luciferase units obtained from untreated *DED1* cells containing the unstructured reporter. Mean and SEM of 3-7 biological replicates are shown. Statistical significance was determined using Student's t-test (unpaired; \*  $p < 0.05$ , \*\*  $p < 0.01$ , \*\*\*  $p < 0.001$  treated vs. untreated samples from the same strain; §  $p < 0.05$ , §§  $p < 0.01$  *ded1-ΔCT* vs *DED1* sample).

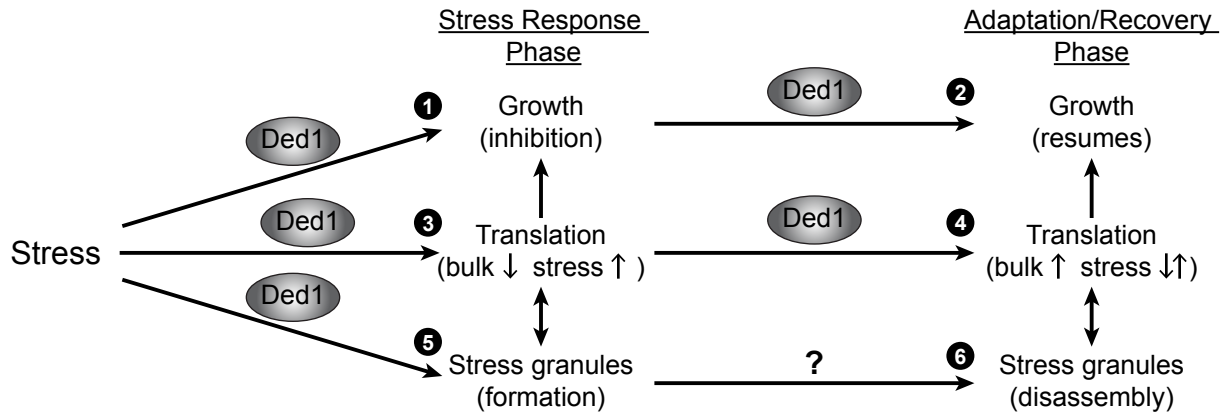

**Figure 8:** *Ded1* has multiple effects during cellular stress responses. A model for *Ded1* function during both the initial stress response and during adaptation/recovery. *Ded1* plays roles in both translation regulation and formation of SGs during the stress response, leading to growth inhibition (1, 3, & 5). Likewise, *Ded1* function is important for translation upregulation in the recovery phase, leading to resumption of growth (2,4). A role in SG disassembly has not been identified to date (6).
